# Supplementary material for: Long-term trends in pH in Japanese coastal waters
Source: Copernicus journal article supplement (doi:10.5194/bg-2019-150), 2019-05-21
Supplement: Supplementary file [file bg-2019-150-AC2-supplement.pdf]

Thank you for your comments. We have replied your comments as follows. We show your comments and our replies in black and blue texts, respectively.

This study determined the long-term trends (from 1978 to 2009) of pH in Japanese coastal waters. They found that both positive and negative pH trends distributed along Japanese coasts. Majority sites have decreasing trends, which is consistent with open ocean. The authors then discussed the impact of warming on the spatial distribution of pH trend and speculated the potential impacts from other processes. Overall, this study presented a very good dataset, but I have less confidence in the methodology in order to derive a robust story.

- 1) After finishing this MS, I am still not sure what kind of data this study used. First, this study did not show any information about salinity, so, the dataset was from freshwater, brackish water or sea water? Can you give more information about the pH measurement? Was pH measured under in-situ temperature, or the samples were taken back to lab and measured at 25\_C? Where did pH minimum or maximum come from? It seems like the min or max values were from entire water column in each site based on Lines 137-138 “NIES gathered all pH data measured at each site and calculated annual minimum and maximum pH”. However, the respiration was more powerful in decreasing pH comparing to anthropogenic CO<sub>2</sub> intrusion (Cai et al, 2011), so, the pH<sub>min</sub> generally came from bottom water, while the maximum came from surface water (without considering other local processes). In other words, pH<sub>max</sub> and pH<sub>min</sub> totally represented the values from different water depth, so, all trend interpretation should be related to the water sources.

We have modified the relevant descriptions to include more detailed information about the measurements by the WPCL program.

>The dataset was from freshwater, brackish water or sea water?

Over 90 % of the data comes from coastal sea water, while less than 10 % comes from estuary. We carefully extracted the measurements in sea water from the whole data archive. To clear this matter, we have changed the term “coastal waters” to “coastal sea waters” in the present manuscript. Readers also can get the information of latitude and longitude, measured pH data, in the supplement data.

>Was pH measured under in-situ temperature, or the samples were taken back to lab and measured at 25\_C?

The pH was measured under in-situ temperature. We have analyzed pH<sub>insitu</sub>, which means pH at ambient sea surface temperature. We have added the word, “in-situ” to clarify this point in the revised version, as follows:

“Similarly, analysis of the Hawaii Ocean Time-series (HOT) (Dore et al. 2009) and the Bermuda Atlantic Time Series (BATS) (Bates 2007) showed that pH at ambient (in-situ) sea surface temperature (pH<sub>insitu</sub>) decreased by  $0.0019 \pm 0.0002$  and  $0.0017 \pm 0.0001 \text{ yr}^{-1}$  from 1988 to 2007 and from 1983 to 2005, respectively.”

>Where did pH minimum or maximum come from? It seems like the min or max values were from entire water column in each site based on Lines 137-138 “NIES gathered all pH data measured at each site and calculated annual minimum and maximum pH”. However, the respiration was more powerful in decreasing pH comparing to anthropogenic CO<sub>2</sub> intrusion (Cai et al, 2011), so, the pH<sub>min</sub> generally came from bottom water, while the maximum came

from surface water (without considering other local processes). In other words, pH<sub>max</sub> and pH<sub>min</sub> totally represented the values from different water depth, so, all trend interpretation should be related to the water sources.

As we mentioned in Section 2.1, “at each basic survey, water samples were collected at several depths (0.5 and 2.0 m) below the surface for all sites, and 10 m where bottom depth was more than this) for times a day to cover diurnal variation. At sites where large variation is found in the daily pH data, additional one day water sampling at 2-hourly intervals (ca. 13 times a day) was made at least twice a year to check the adequacy of basic water sampling protocol.” The measurement depths depend on the area and rely on the licensed operators. NIES does not discriminate surface and 10m data, so we speculate that pH maximum substantially represents winter pH of surface waters, while pH minimum represents summer pH of 10m waters. As you noticed, this means that pH maximum may have been affected mainly by historical change of marine production rather than anthropogenic CO<sub>2</sub>. We assessed this possibility in line 414-419 in revised manuscript. Anyway, we can state that the measurement depth at each site did not change case by case. It was routinized.

We speculate that some monitoring sites should be forced by biological activity, but some not. The situations depend on time and place. To remove extreme data that would be affected by significant biological activity, we adopted the strict quality control procedures and then used the time-series of pH that passed the strict criteria in the analysis. We consider that the remaining moderated max-min variations in the data after QCs were mainly caused by the seasonal variations of the thermal effect (D(T)).

- 2) I am not sure how pH<sub>min</sub> or pH<sub>max</sub> could be representative of the average pH situation in specific year. This min or max values have a good chance to be affected by extreme events, for example, phytoplankton blooms or heavy flooding events. I am not sure whether the trends or pH<sub>min</sub> or pH<sub>max</sub> can represent the overall pH change rates in that sites. However, it did represent the variation of pH in each year. Did the authors find the difference between pH<sub>max</sub> and pH<sub>min</sub> change (increase or decrease) over time? This examination can also help derive useful information about CO<sub>2</sub> chemistry data change over time, because extreme values matter. Here are a few references the authors may need.

Fassbender, A. J., K. B. Rodgers, H. I. Palevsky, and C. L. Sabine (2018), Seasonal Asymmetry in the Evolution of Surface Ocean pCO<sub>2</sub> and pH Thermodynamic Drivers and the Influence on Sea-Air CO<sub>2</sub> Flux, *Global Biogeochemical Cycles*, 32(10), 1476-1497.

Landschützer, P., N. Gruber, D. C. E. Bakker, I. Stemmler, and K. D. Six (2018), Strengthening seasonal marine CO<sub>2</sub> variations due to increasing atmospheric CO<sub>2</sub>, *Nature Climate Change*.

Thank you for your suggestions. But we have avoided analyzing the difference between pH<sub>max</sub> and pH<sub>min</sub> because differencing two variables could lead to enhancement of data errors. As for the references mentioned above, those references could be useful to mention seasonal variability of pCO<sub>2</sub> and the asymmetric response of air-sea CO<sub>2</sub> flux. We have added relevant new descriptions in Section 4.2.1.

- 3) The authors did a lot of work in quality control by step 1, 2, 3. In my opinion, step 1 is strict enough. Removing the outlier points instead of entire time sequence can keep all 1481 sites. I do not agree with “step 3” to get rid of “random errors”. The authors removed the time sequences whose pH<sub>in situ</sub> stdev > the average stdev of 1127 sites. With this process, you

actually removed all the sites that have a high stdev, which may have nothing to do with random errors. For the sites with a strong biological activity, or a site that is easy affected by the river discharge, they all have large stdev. However, this is their feature, but not caused by “error”. With this operation (step 3, and extra step from Line 197-198), you have already excluded all the sites that were affected by B(T,N) and Alk (S). Thus, only the sites with mild hydrological or biological variation, and strong thermal impact were left. I fail to see why this process was included in this manuscript.

We keep this form by using the quality control (QC) steps 1, 2 and 3, because if the data include a lot of processes resulting in the large variability deviating from the average pH, the discussion would be more complicated. So it would be better to keep this form and to use the data only with moderated variations.

We partly agree with your comment: “you have already excluded all the sites that were affected by B(T, N) and Alk (S)”. But even after applying the all QC steps, the trend distributions involve some variability around the averages (Figs.7e and 7f). We thus discuss possible variations which might be caused by area-dependent B(T, N) and Alk (S) effects. Since there is no available data of ALK(S) for checking our data, we do not much discuss the influence of Alk (S) (Section 4.2). As for the discussion of B(T, N), we suggest coastal acidification/basification mechanisms by comparing the pH trends and TN ones (Section 4.2.2 and Fig. 14).

- 4) I have difficulty in understanding why the authors compared pHmin with Tmax or pHmax with Tmin across the maintext. Line 142 “the pH values were lowest in summer and highest in winter”.

To make readers more clearly understand this thermal effect, we have added a term

“ $H_2O \leftrightarrow H^+ + OH^-$ ” in this part as follows.

“Previous studies have reported negative correlations between seasonal variations in pH and water temperature, mainly because of changes in the dissociation constant in dissociation equilibrium ( $H_2O \leftrightarrow H^+ + OH^-$ ).”

- 5) My concern is the pH value was also impacted by biological activities (photosynthesis and respiration). Thus, high temperature in summer cannot guarantee low surface pH, when the photosynthesis was very strong. Please check through the maintext.

The QC steps effectively work to exclude pHmax and pHmin data caused by the extreme biological effects. Max-min pH variations in the remaining data after QCs are considered to be caused by mainly the seasonal thermal effect as explained above. In the revised manuscript, we have improved the descriptions to clarify our viewpoint about the possible influences on the pH<sub>insitu</sub> trends in coastal sea waters (Section 4.2, 4.2.1, 4.2.2).

- 6) Based on the 289 sites, the authors derived two sets of pH trends:  $-0.0014 \pm 0.0033$  and  $-0.0024 \pm 0.0042$  yr<sup>-1</sup> for pHmin and pHmax, respectively. Are these two trends significant

different? A paired t-test is needed here.

Yes, the two trend averages are significantly different from each other. That suggests the seasonal difference in the thermal effects on  $\text{pH}_{\text{in situ}}$  trends (Section 4.2.1). We have added this information in the revised manuscript.

- 7) Fig. 7 included all the trends across the 289 sites, both significant and insignificant. Can you only include the significant trends? What is the average value of significant trends? Based on the discussion in section 4.1, the threshold of significant pH trend (caused by measurement precision only) is  $-0.002 \text{ yr}^{-1}$ . Other variation of pH (i.e. caused by local processes), should also impact the detection of significant trends. This can be further examined by previous comment (#5).

If we select the significant trends alone, the trends with larger magnitudes remain. A left panel of Fig. R1 shows a histogram of some pH trends including both statistically significant and insignificant values, representing a shape like the normally distribution with a negative shift. A right panel shows a histogram of selected trends with statistical significance for  $\Delta\text{pH}$  not zero, indicating that the trends with  $\Delta\text{pH} \approx 0$  disappear in this case and the relatively large negative pH trends tend to remain in the distribution. These figures illustrate dominant existence of the negative trends, but this procedure results in deleting the trends of monitoring sites with  $\Delta\text{pH} \approx 0$ , which must actually exist.

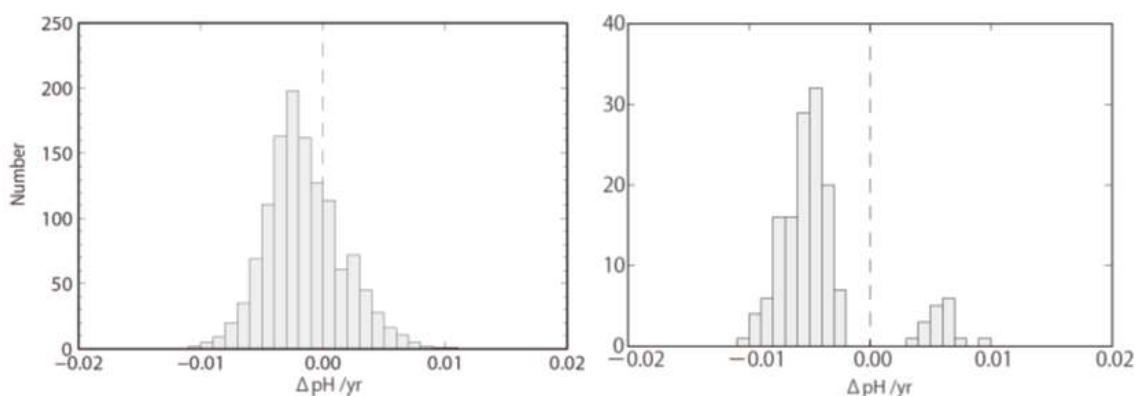

Figure R1. Examples of histograms of pH trends both with and without statistical significance for  $\Delta\text{pH}$  not zero (left) and only with significance (right).

- 8) The discussion between pH change and heterotrophic or autotrophic is very weak. In addition, I still think the 289 sites have already excluded the stations that have strong biological activities.

We suggest possible heterotrophic/ autotrophic pH responses to eutrophication/ oligotrophication inferred by relations between the pH and TN trends shown in Fig.14. The negative correlation evaluated from Fig.14 further suggests dominance of the heterotrophic sites. Since we consider that this result alone is not sufficient for rigid confirmation of our consideration, we modified abstract and relevant descriptions. However, we still note that variability remaining in the pH trends after the QC steps suggests coastal acidification/basification processes, which could be affected by the heterotrophic/ autotrophic conditions of each site.

9) Do the salinity or water discharge change support the conclusion in Line 431?

Salinity data and/or information of water discharges suitable for cross-comparison with the pH data used in this study are not available. It is difficult to directly answer this question.

Replies for your comments in the manuscripts:

>There is also some unclear description in maintext, figure caption, and legend. 1.

1. It should be 289 sites (under current version) in the abstract, but not 1481.

Following your comment, we have changed the part from “1481 monitoring sites” to “289 monitoring sites”.

2. How did you get the mean value in Line 165? Average of pH<sub>min</sub> and pH<sub>max</sub>?

For clarification, we have improved this part with the words “average of minimum and maximum pH<sub>insitu</sub>”, as follows, in the present manuscript (Section 2.1).

“We then excluded time sequences with outliers, defined as sites with data points that were more than three standard deviations from the average of minimum and maximum pH<sub>insitu</sub> for each year.”

3. Lines 206-211, what is the “standard deviations of pH<sub>insitu</sub> trends”? The legend and caption of figure 6 is very confusion. A comment here (in my opinion), this MS studied the trend instead of absolute value. So, the site crosscheck may have very minor impact on the final results.

We have modified legend and captions of Fig. 6. At first, we have used the thin and bold lines to discern minimum and maximum pH<sub>insitu</sub> data at each monitoring station in this figure. We have added the relevant description to the caption.

4. Lines 232 to 235, the reference here reported pH<sub>25</sub>, so this comparison should be moved to later section.

We moved this part to the later section (Section 4.2.1).

5. Lines 319-321, I have difficulty in understanding “both DIC (B (T, N)) and Alk (S) are difficult to have general trends that covered all monitoring sites, because factors that control these variables have no mutual trends all over the Japan coast”.

The overall pH<sub>insitu</sub> trends shown in Fig.7 were governed by the thermal effect, D(T), and ocean acidification, DIC(Air CO<sub>2</sub>), because the all monitoring sites are equally affected by these global factors. In contrast, DIC (B(T, N)) and Alk (S) were significantly affected by local situations, depending on regions. The variability among the pH<sub>insitu</sub> trends, which are characterized by standard deviations of the trends populations, were caused by such local factors. To emphasize this viewpoint, we have modified abstract and all relevant descriptions.

6. Lines 321- 324, why did “same trend of B (T, N) leads opposite trends of DIC (B (T, N) ) between autotrophic and heterotrophic ocean”? How do you define the “autotrophic and

heterotrophic” here?

We consider that the heterotrophic conditions are defined as the increasing (decreasing) response of DIC to eutrophication (oligotrophication), and vice versa for the autotrophic condition. For example, the sites shown in the second quadrant of Fig.14 means negative pH trends (increasing DIC) involve positive TN trends (eutrophication) at those sites. But we realize that this consideration is based on some assumptions that not well confirmed by only the available data from the WPCL data archive. We modified abstract and conclusion for clarification.

6. Line365, a typo? from 8.2565 to 8.2560?

Yes, this is a typo. We have corrected as 8.2565 to 8.2560. Thank you for your careful notice.

7. Line 384-396, how would the previous studies relate to your results? Some more in-depth discussion is needed here.

Here we discuss possible regional differences in the pH trends caused by the localized biological factors. We have simplified the descriptions to emphasize this point.

8. Fig. 3. Red and blue colors indicated the annual MAXIMUM and MINIMUM pHinsitu data.

That is correct. We have modified it.

9. Fig. 9, there is no “black and red shading” as said in caption.

We have deleted it. Thank you for your indication. We have again carefully checked the all captions to remove such incorrect descriptions.

1 Long-term trends in pH in Japanese coastal sea waters

2  
3 Miho Ishizu<sup>1</sup>, Yasumasa Miyazawa<sup>1</sup>, Tomohiko Tsunoda<sup>2</sup>, Tsuneo Ono<sup>3</sup>

4  
5 <sup>1</sup>E-mail: [mishizu@jamstec.go.jp](mailto:mishizu@jamstec.go.jp)

6 <sup>1</sup>E-mail: [miyazawa@jamstec.go.jp](mailto:miyazawa@jamstec.go.jp)

7 Japan Agency for Marine-Earth Science and Technology, Environmental Variability Prediction and  
8 Application Research Group, Yokohama Institute for Earth Sciences, 3173-25 Showa-machi,  
9 Kanagawa-ku, Yokohama 236-0001, Japan

10 Tel: +81-45-778-5875

11 Fax: +81-45-778-5497

12

13 <sup>2</sup>E-mail: [t-tsunoda@spf.or.jp](mailto:t-tsunoda@spf.or.jp)

14 The Ocean Policy Research Institute of the Sasakawa Peace Foundation, 1-15-16, Toranomom Minato-  
15 ku, Tokyo 105-8524, Japan

16

17 <sup>3</sup>E-mail: [tono@affrc.go.jp](mailto:tono@affrc.go.jp)

18 Japan Fisheries Research Education Agency, 15F Queen's Tower B, 2-3-3 Minato Mirai, Nishi-ku,  
19 Yokohama, Kanagawa 220-6115, Japan

20

21 **Abstract**

22 In recent decades, acidification of the open ocean has shown consistent increases. However,  
23 analysis of long-term data in coastal sea waters shows that the pH is highly variable because of coastal

24 processes and anthropogenic carbon inputs. It is therefore important to understand how anthropogenic  
25 carbon inputs and other natural or anthropogenic factors influence the temporal trends in pH in coastal  
26 sea waters. Using water quality data collected at 289 monitoring sites as part of the Water Pollution  
27 Control Program, we determined the long-term trends of  $\text{pH}_{\text{insitu}}$  in Japanese coastal sea waters at  
28 ambient temperature from 1978 to 2009. We found that  $\text{pH}_{\text{insitu}}$  decreased (i.e., acidification) at  
29 between 70% and 75% of the sites and increased (i.e., basification) at between 25% and 30% of the  
30 sites. The rate of decrease varied seasonally and was, on average,  $-0.0014 \text{ yr}^{-1}$  in summer and  $-0.0024$   
31  $\text{yr}^{-1}$  in winter, but with relatively large deviations from these average values. The seasonal variation in  
32 the average  $\text{pH}_{\text{insitu}}$  trends reflects variability in warming trends. The trend distributions of pH  
33 normalized at 25 deg. C also showed negative shifts, suggesting indication of ocean acidification that  
34 has occurred in Japanese coastal sea waters.

35

36 Keywords: pH,  $\text{CO}_2$ , Global warming, Ocean acidification, Coastal  
37 acidification/basification, Data analysis

38

## 39 1. Introduction

40 The effect of ocean acidification on several marine organisms, including calcifiers, is widely  
41 acknowledged and is the topic of various marine research projects worldwide. Chemical variables  
42 related to carbonate cycles are monitored in several ongoing ocean projects to determine whether the



43 rate of ocean acidification can be identified from changes in pH and other variables in the open ocean  
44 (Gonzalez-Davila et al. 2007; Dore et al. 2009; Bates 2007; Bates et al. 2014; Midorikawa et al. 2010;  
45 Olafsson et al. 2009; Wakita et al. 2017). Analysis of pH data measured in situ at the European Station  
46 in the Canary Islands (ESTOC) in the North Atlantic from 1995 to 2003 and normalized to 25 deg. C  
47 showed that  $\text{pH}_{25}$  decreased at a rate of  $0.0017 \pm 0.0005 \text{ yr}^{-1}$  (Gonzalez-Davila et al. 2007). Similarly,  
48 analysis of the Hawaii Ocean Time-series (HOT) (Dore et al. 2009) and the Bermuda Atlantic Time  
49 Series (BATS) (Bates 2007) showed that pH at ambient (in-situ) sea surface temperature ( $\text{pH}_{\text{insitu}}$ )  
50 decreased by  $0.0019 \pm 0.0002$  and  $0.0017 \pm 0.0001 \text{ yr}^{-1}$  from 1988 to 2007 and from 1983 to 2005,  
51 respectively. Analysis of data collected along the hydrographic observation line at  $137^\circ\text{E}$  in the western  
52 North Pacific by the Japanese Meteorological Agency (JMA) showed that  $\text{pH}_{25}$  decreased by  
53  $0.0013 \pm 0.0005 \text{ yr}^{-1}$  in summer and  $0.0018 \pm 0.0002 \text{ yr}^{-1}$  in winter from 1983 to 2007 (Midorikawa et  
54 al. 2010). The winter  $\text{pH}_{\text{insitu}}$  in surface water in the Nordic Seas decreased at a rate of  $0.0024 \pm 0.0002$   
55  $\text{yr}^{-1}$  from 1985 to 2008 (Olafsson et al. 2009). This rate was somewhat more rapid than the average  
56 annual rates calculated for the other subtropical time-series stations in the Atlantic Ocean, BATS, and  
57 ESTOC, and was attributed to the air-sea  $\text{CO}_2$  flux and buffering capacity (higher Revelle factor)  
58 (Olafsson et al. 2009), which were higher and lower than those in subtropical regions, respectively.  
59 Wakita et al. (2017) estimated that the annual and winter  $\text{pH}_{\text{insitu}}$  at station K2 in the subarctic western  
60 North Pacific decreased at rates of  $0.0025$  and  $0.0008 \text{ yr}^{-1}$ , respectively, from 1999 to 2015. The lower  
61 rate in winter was explained by increases in dissolved inorganic carbon (DIC) and total alkalinity (Alk)

62 that resulted from climate-related variations in ocean currents.

63 These long-term time-series from various sites in the open ocean indicate consistent changes in  
64 surface ocean carbon chemistry, which mainly reflect the uptake of anthropogenic CO<sub>2</sub>, with  
65 consequences for ocean acidity. Coastal [sea](#) waters, however, differ from the open ocean as they are  
66 subjected to multiple influences, such as hydrological processes, land use in watersheds, nutrient inputs  
67 (Duarte et al. 2013), changes in the structure of ecosystems caused by eutrophication (Borges and  
68 Gypens 2010; Cai et al. 2011), marine pollution (Zeng et al. 2015), and variations in salinity (Sunda  
69 and Cai 2012).

70 Duarte et al. (2013) hypothesized that anthropogenic pressures would cause the pH<sub>insitu</sub> of coastal  
71 [sea](#) waters to decrease (acidification) or increase (basification), depending on the balance between the  
72 atmospheric CO<sub>2</sub> inputs and watershed exports of alkaline compounds, organic matter, and nutrients.  
73 [For example, in Chesapeake Bay, trends in pH<sub>insitu</sub> have shown temporal variations over the last 60](#)  
74 [years, presumably because of the combined influence of increases and decreases in pH<sub>insitu</sub> in the](#)  
75 [mesohaline and polyhaline regions of the mainstem of the bay, respectively \(Waldbusser et al. 2011;](#)  
76 [Duarte et al. 2013\).](#)

77 These processes that occur only in coastal regions might cause increases or decreases in the rate of  
78 acidification, meaning that the outcomes for coastal ecosystems in different regions will vary. At  
79 present we have limited information about long-term changes in pH in coastal [sea](#) waters, mainly  
80 because of the difficulty involved in collecting continuous long-term data from coastal [sea](#) waters

81 around an entire country at a spatial resolution that is sufficient to cover the high regional variability  
82 in coastal pH.

83 The Water Pollution Control Law (WPCL) was established in 1970 to deal with the serious  
84 pollution of the Japanese aquatic environment in the 1950s and 1960s. Several environmental variables,  
85 including  $\text{pH}_{\text{insitu}}$ , have been continuously measured in coastal waters since 1978, using consistent  
86 methods enacted in the monitoring program [under the government leadership](#), to help protect coastal  
87 water and groundwater from pollution and retain the integrity of water environments. The errors in pH  
88 measurements collected in this program were assessed as outlined in the JIS Z8802 (JIS; Japanese  
89 Industrial Standard) standard protocol (2011) that corresponds to the ISO 10523 (ISO; International  
90 Organization for Standardization) standard protocol. Compared with the specialized oceanographic  
91 protocols described in the United States Department of Energy (DOE) Handbook (1994), it is not  
92 difficult to achieve the JIS protocol. The JIS and DOE standard protocols allow measurement errors of  
93 less than  $\pm 0.07$  and  $\pm 0.003$ , respectively, for the glass electrode method, and the DOE protocol  
94 demands a precision of  $\pm 0.001$  for the spectrophotometric method. Measurements are generally made  
95 with the higher-quality spectrophotometric method during major oceanographic studies (e.g.  
96 Midorikawa et al. 2010). The coastal monitoring program in Japan comprises more than 2000  
97 monitoring sites that cover most parts of the coastline (Fig. 1), so the dataset provides the opportunity  
98 to estimate the overall trend in pH in Japanese coastal areas and the regional variability in the trends  
99 from data with a known precision.

100 In the present study, we examined the  $\text{pH}_{\text{insitu}}$  trends in surface coastal sea waters from data  
101 measured as part of WPCL monitoring programs. We then examined the trends at specific locations.  
102 The remainder of this manuscript is organized as follows: the data and methods are described in Section  
103 2, and trends in  $\text{pH}_{\text{insitu}}$  are presented in Section 3, the results are discussed in Section 4 and the  
104 concluding remarks are provided in Section 5.

105

## 106 2. Materials and Methods

### 107 2.1 Water Pollution Control Law (WPCL) monitoring data

108 Data for several environmental variables, including  $\text{pH}_{\text{insitu}}$ , and the associated metadata, are  
109 available on the website of the National Institute for Environmental Studies ([www.nies.go.jp/igreen](http://www.nies.go.jp/igreen);  
110 [http://www.nies.go.jp/igreen/md\\_down.html](http://www.nies.go.jp/igreen/md_down.html)). We downloaded data for  $\text{pH}_{\text{insitu}}$  from 1978 to 2009 for  
111 the trend analysis. We also downloaded temperature (T) and total nitrogen (TN) data that were  
112 measured at the same sites as the  $\text{pH}_{\text{insitu}}$  data for the same time period (data for T and TN from 1981  
113 to 1995 were available), to check the quality of the  $\text{pH}_{\text{insitu}}$  data (Section 2.2), and to discuss coastal  
114 processes that influenced the  $\text{pH}_{\text{insitu}}$  (Section 4.2).

115 The data were collected by the Regional Development Bureau of the Ministry of Land,  
116 Infrastructure, Transport and Tourism, and the Ministry of the Environment under the WPCL  
117 monitoring program. Monitoring protocols (sampling frequencies, locations, and methods) are outlined  
118 in the program guidelines (NIES 2018; MOE 2018) written in Japanese, and here we summarize these

119 protocols.

120 Monitoring operations are occupied at 1481 sites along the Japan coast shown in Figure 1a. Most  
121 stations locate coastal area while <10 % of the station locates estuary. In each monitoring sites, basic  
122 surveys were held 4 to 40 times a year dependent to the site. Information on the sampling frequency at  
123 the monitoring sites is presented in Table 1. At each basic survey, water samples were collected at  
124 several depths (0.5 and 2.0 m below the surface for all sites, and 10 m where the bottom depth was  
125 more than this) four times a day to cover diurnal variation. At sites where large variation is found in  
126 the daily pH data, additional one day water sampling at 2-hourly intervals (ca. 13 times a day) was  
127 made at least twice a year to check the adequacy of basic water sampling protocol.

128 Measurements of pH for each water sample were made following the Japanese Industrial  
129 Standard protocol JIS Z 8802 (2011), which is equivalent to ISO10523  
130 (<https://www.iso.org/standard/51994.html>). Namely, pH was measured by glass electrode calibrated  
131 by NBS standard buffers. Basically, pH measurement was carried out just after the water sampling at  
132 in-situ water temperature. Permitted repeatability in each measurement was  $\pm 0.07$ . NIES gathered all  
133 pH data measured at each site and calculated annual minimum and maximum pH, providing them  
134 through their website.

135 The published WPCL pH dataset only contains these annual minimum and maximum pH data in  
136 each year, reported on the NBS pH scale ( $\text{pH}_{\text{insitu}}$ ) and rounded to one decimal place. Water temperature  
137 data are also available for each sampling event ([http://www.nies.go.jp/igreen/md\\_down.html](http://www.nies.go.jp/igreen/md_down.html)).

138 Previous studies have reported negative correlations between seasonal variations in pH and water  
139 temperature, mainly because of changes in the dissociation constant [in dissociation equilibrium](#)  
140  $(H_2O \leftrightarrow H^+ + OH^-)$ ; the pH values were lowest in summer and highest in winter, in both the open  
141 ocean (e.g. Bates et al. 2014) and coastal [sea](#) waters (e.g., Frankignoulle and Bouquegneau 1990; Byrne  
142 et al. 2013; Hagens et al. 2015; Challener et al. 2016). We therefore assumed that the minimum and  
143 maximum pH data coincided with the highest and lowest temperatures, respectively (Fig. 2), and we  
144 used these data to calculate pH<sub>25</sub> in Section 4.2. [NIES do not discriminate surface \(0.5m – 2m\) and](#)  
145 [subsurface \(10 m\) data when they calculate annual maximum and minimum pH, so it is speculated that](#)  
146 [annual maximum pH substantially represents winter pH of surface waters, while annual minimum pH](#)  
147 [represents summer pH of subsurface waters.](#)

148 The monitoring operations were carried out by licensed operators as outlined in the annual plan of  
149 the Regional Development Bureau of each prefecture. These specific licensed operators were retained  
150 for the duration of the measurement period, which means that the same laboratories were always in  
151 charge of collecting the data. This approach helps to prevent systematic errors that might arise both  
152 between measurement facilities and over time, and ensures the datasets are accurate.

153

## 154 2.2 Quality control procedures and assessing the consistency of the WPCL monitoring data

155 We [selected all the data for fixed sites in coastal sea waters](#) that had continuous time-series from  
156 1978 to 2009. There were 2463 regular and non-regular monitoring sites in 1978 and 2127 sites in

157 2009. While there were few sites in some prefectures in Hokkaido and Tohoku, the monitoring sites  
158 covered almost all the coastline in Japan (Fig. 1).

159 As explained in more detail later in this section, we applied a three-step quality control procedure.  
160 We excluded 1) discontinuous time sequences, 2) time sequences that had extreme outliers in each year,  
161 and 3) time sequences that included significant random errors and which were only weakly correlated  
162 with time sequences at adjacent sites.

163 When we excluded the sites that had discontinuous time sequences of  $\text{pH}_{\text{insitu}}$  from 1978 to 2009,  
164 1481 sites remained (Fig. 1). We then excluded time sequences with outliers, defined as sites with data  
165 points that were more than three standard deviations from [the average of minimum and maximum](#)  
166  $\text{pH}_{\text{insitu}}$  for each year. After this step, 1127 sites remained (not shown). We calculated the trends in the  
167 unbroken continuous time sequences of the minimum and maximum  $\text{pH}_{\text{insitu}}$  data at each site with  
168 linear regression (Fig. 3), and the slopes of the linear regression were taken as the minimum and  
169 maximum  $\text{pH}_{\text{insitu}}$  trends (e.g. Fig. 3). The linear regression trends might have been influenced by  
170 random errors or variations at different temporal scales in the data for each site. To eliminate the  
171 influence of these errors and variations as far as possible, we removed the data that had significant  
172 random errors, defined as the time sequences for which the standard deviations of  $\text{pH}_{\text{insitu}}$  exceeded the  
173 average standard deviation of the  $\text{pH}_{\text{insitu}}$  time sequences at the 1127 sites. After this step, 302 sites  
174 remained (see Fig. 1b for site locations).

175 For the 302 sites, we calculated the correlations of water temperature (Fig. 4a–b) and  $\text{pH}_{\text{insitu}}$  (Fig.

176 4c–d) at adjacent monitoring sites in the same prefecture (Fig. 4). At most of the stations, the  
177 correlations between the temperatures at the site pairs were relatively strong, which indicates that the  
178 temperature followed similar patterns over time at adjacent sites (Fig. 4a–b). The correlations tended  
179 to be strong when the sites were close together, but gradually weakened with increasing distance  
180 between sites. The patterns in the  $\text{pH}_{\text{insitu}}$  and temperature correlations were similar (Fig. 4), which  
181 indicates that the  $\text{pH}_{\text{insitu}}$  and temperature data at adjacent monitoring sites varied in the same way. In  
182 other words, the relative ratios of the measurement errors in  $\text{pH}_{\text{insitu}}$  and the natural spatio-temporal  
183 variations at these monitoring sites were similar to those for temperature. The absolute values of the  
184  $\text{pH}_{\text{insitu}}$  correlation coefficients were slightly lower than those for temperature for each corresponding  
185 pair of sites (Figs. 4 and 5), and might reflect the fact that  $\text{pH}_{\text{insitu}}$ , but not the water temperature, is  
186 subjected to strong forcing by coastal biological processes, which causes short-term variations in  
187  $\text{pH}_{\text{insitu}}$ . The correlations between the minimum  $\text{pH}_{\text{insitu}}$  data (Fig. 4c) were weaker than those for the  
188 maximum  $\text{pH}_{\text{insitu}}$  data (Fig. 4d) because the degree of biological forcing varied by season and was  
189 stronger in summer when  $\text{pH}_{\text{insitu}}$  was at a minimum and weaker in the winter when  $\text{pH}_{\text{insitu}}$  was at a  
190 maximum. Despite the influence of biological processes on  $\text{pH}_{\text{insitu}}$ , the correlation coefficients  
191 remained high and were significant ( $r=0.367$ ,  $p<0.05$ ) at most of the monitoring sites, especially at  
192 sites that were less than 5 km apart within the same prefecture; at such sites,  $\text{pH}_{\text{insitu}}$  followed similar  
193 patterns. In the final step of the quality check procedure (step 3), we removed all the time sequences  
194 with weak and insignificant correlations for temperature and  $\text{pH}_{\text{insitu}}$  (Figs. 4 and 5). After this final



195 step, 289 sites remained.

196 As shown in Table 2, the correlations between temperature and  $\text{pH}_{\text{insitu}}$  at sites that were within 15  
197 km of each other strengthened after steps 2 and 3, which suggests that the reliability of the dataset  
198 improved at each step of the quality control. The mutual correlations among the  $\text{pH}_{\text{insitu}}$  and temperature  
199 measurements at adjacent sites (Table 2), and the correlations between  $\text{pH}_{\text{insitu}}$  trends and TN ones  
200 (Table 3) show that the quality control procedures were effective.

201 The monitoring in each prefecture is carried out by different licensed operators, decided by the  
202 Regional Development Bureau in each prefecture. *Inter-calibration essays have not been conducted*  
203 *between different licensed operators.* Even though all the operators follow the same JIS protocol,  
204 manual monitoring can introduce systematic errors into the data. Some adjacent monitoring sites are  
205 close to each other but are managed by different operators, such as sites close to the boundaries between  
206 Osaka and Hyogo (Fig. 6a), Hyogo and Okayama (Fig. 6b), Kagawa and Okayama (not shown), and  
207 Kagawa and Ehime (not shown). The  $\text{pH}_{\text{insitu}}$  time sequences for these site pairs were generally similar,  
208 even though there were some deviations when compared with the time sequences for adjacent sites  
209 within the same prefecture, monitored by the same operator (lines of the same color in Fig. 6). The  
210 standard deviations of the  $\text{pH}_{\text{insitu}}$  trends between these site pairs close to the boundaries of Osaka and  
211 Hyogo, Hyogo and Okayama, Kagawa and Okayama, and Kagawa and Ehime were 0.0014, 0.0012,  
212 0.0026, and  $0.0017 \text{ yr}^{-1}$ , respectively, and were smaller than the acceptable measurement errors of the  
213 JIS standard protocols. We can therefore say that the measurements from the different operators in

214 different prefectures were consistent.

215

### 216 3. Results

#### 217 3.1 Variations in $\text{pH}_{\text{insitu}}$ highlighted by regression analysis

218 The histograms of the calculated  $\text{pH}_{\text{insitu}}$  trends ( $\text{yr}^{-1}$ ), for the minimum and maximum  $\text{pH}_{\text{insitu}}$  after  
219 each quality control step, are shown in Fig. 7. The histogram in Fig. 7a–b shows data of the 1481 sites  
220 (discontinuous sites excluded). The data for 1127 sites (i.e., data without outliers from step 2) are  
221 shown in Fig. 7c–d, and the data for 289 sites (from step 3) are shown in Fig. 7e–f (Section 2.2). The  
222 number of sites decreased at each step of the quality control, but the shapes of the histograms were  
223 generally similar for both the minimum and maximum pH trends. The total trends showed overall  
224 normal distributions with a negative shift for all the processing level.

225 We detected both positive (basification) and negative (acidification) trends, which contrasts with  
226 the findings of other researchers who reported only negative trends (ocean acidification) in the open  
227 ocean (Bates et al. 2014; Midorikawa et al. 2010; Olafsson et al. 2009; Wakita et al. 2017). The average  
228 ( $\pm$  standard deviation) trends for the minimum and maximum  $\text{pH}_{\text{insitu}}$  data were  $-0.0002 \pm 0.0061$  and  
229  $-0.0023 \pm 0.0043 \text{ yr}^{-1}$  for the 1481 sites (Fig. 7a–b), and  $-0.0005 \pm 0.0042$  and  $-0.0023 \pm 0.0036 \text{ yr}^{-1}$  for  
230 the 1127 sites (Fig. 7c–d), respectively. The average trends for the minimum and maximum  $\text{pH}_{\text{insitu}}$   
231 data for the 289 sites that remained after step 3 were  $-0.0014 \pm 0.0033$  and  $-0.0024 \pm 0.0042 \text{ yr}^{-1}$ ,  
232 respectively (Fig. 7e–f).

233 The negative trends were relatively weak for the minimum  $\text{pH}_{\text{insitu}}$  data and relatively strong for  
234 the maximum  $\text{pH}_{\text{insitu}}$  data, but there was an overall tendency towards acidification. At the 289 sites,  
235 there were 204 negative and 86 positive trends for the minimum  $\text{pH}_{\text{insitu}}$  data and 217 and 72 negative  
236 and positive trends for the maximum  $\text{pH}_{\text{insitu}}$  data. This shows that for the minimum data, there were  
237 acidification and basification trends at 70% and 30% of the monitoring sites, respectively, with values  
238 of 75% and 25% for the maximum data, respectively.

239

### 240 3.2 Local patterns in acidification and basification

241 We examined the  $\text{pH}_{\text{insitu}}$  trends for the 289 sites for local patterns in acidification and basification  
242 (Section 2.2), and found that the trends seemed to be randomly distributed. For example, the values  
243 were different at sites that were less than 50 km apart (Fig. 8). There are many monitoring sites in the  
244 Seto Inland Sea and in Western Kyushu. The trends for the minimum and maximum  $\text{pH}_{\text{insitu}}$  showed  
245 both acidification and basification in the Seto Inland Sea (Fig. 8a–b, 8c–d). In the western part of  
246 Kyushu, acidification dominated (Fig. 8a–b, 8c–d) and there were few clusters of basification in  
247  $\text{pH}_{\text{insitu}}$  for both the minimum and maximum  $\text{pH}_{\text{insitu}}$  data (Fig. 8b, d). Figure 8a (b) and Figure 8c (d)  
248 are similar, which suggests that, at most of the sites where we detected acidification and basification,  
249 the trend directions were consistent for the minimum and maximum  $\text{pH}_{\text{insitu}}$  (Fig. 8a–b, 8c–d).

250 By examining the average minimum and maximum  $\text{pH}_{\text{insitu}}$  trends in each prefecture (Fig. 9a–b, d–e,  
251 g–h, j–k), we found that, while the average values were slightly different, the trends in the averaged

252 values and the patterns in acidification and basification for both the minimum and maximum  $\text{pH}_{\text{insitu}}$   
253 were the same from north to south and from west to east. We also found acidification trends in most of  
254 the prefectures with at least 17 sampling sites, namely Miyagi, Wakayama, Hyogo, Okayama,  
255 Yamaguchi, Tokushima, Kagawa, Ehime, and Nagasaki (Figs. 1a and 9c, f, i, l). The average estimates  
256 for the maximum  $\text{pH}_{\text{insitu}}$  were larger than those for the minimum  $\text{pH}_{\text{insitu}}$  in these prefectures.

257 We found more acidification trends for the minimum  $\text{pH}_{\text{insitu}}$  in the southwestern prefectures of  
258 Yamaguchi, Kagawa, Ehime, Hyogo, and Nagasaki than in the northeastern prefecture of Miyagi (Fig.  
259 9a, d, g, i) (see Fig. 1 for locations). The maximum and minimum  $\text{pH}_{\text{insitu}}$  trends indicated basification  
260 in Wakayama and Okayama prefectures (Fig. 9c). The trends in Osaka, Hyogo, Okayama, Hiroshima,  
261 Yamaguchi, Kagawa, and Ehime prefectures (Fig. 1a) were different from each other, even though they  
262 were all located in the same part of the Seto Inland Sea (Fig. 9d–e). The trends in Hiroshima and  
263 Okayama, within the Seto Inland Sea, were weaker than those in Hyogo, Yamaguchi, Kagawa, and  
264 Ehime, which were outside the sea (Fig. 9d–e). The  $\text{pH}_{\text{insitu}}$  trend values indicated relatively strong  
265 acidification at  $-0.0025 \text{ yr}^{-1}$  in Niigata in the Japan Sea (Fig. 9j–l) but there were fewer than the  
266 threshold of 17 monitoring sites in the prefectures.

267

## 268 4. Discussion

### 269 4.1 Statistical evaluation of our estimated overall trends

270 The JIS Z8802 (2011) allows a measurement error of  $\pm 0.07$  and this treatment further enhanced the

271 uncertainty of the published data to  $\pm 0.1$ . The uncertainty of the slope of the linear regression line ( $\sigma_\beta$ )  
272 is estimated by the following equation (e.g., Luenberger 1969):

$$273 \quad \sigma_\beta = \{ \sigma_y^2 / \sum(x_i - [x])^2 \}^{1/2} \quad (1)$$

274 where  $\sigma_y^2$  is the theoretical variance in a pH value caused by the measurement error (in this case,  $0.1^2$   
275 = 0.01); and  $x_i$  and  $[x]$  represent the year and the year averaged for all data at a station, respectively.

276 In the WPCL dataset, there are generally 32 data points for each station (for every year from 1978 to  
277 2009), spaced at consistent intervals. In this case,  $\sum(x_i - [x])^2$  becomes 2728 and  $\sigma_\beta$  becomes 0.0020  
278  $\text{yr}^{-1}$ , which is the threshold of significance for the pH trend. This means that our estimated trends  
279 included standard deviations that were less than  $0.0020 \text{ yr}^{-1}$ , and, if there were no trends, a histogram  
280 of pH trends should have a normal distribution with an average and standard deviation ( $\sigma_\beta$ ) of 0.0000  
281 and  $0.0020 \text{ yr}^{-1}$ , respectively (Fig. 7). The average trend in the maximum  $\text{pH}_{\text{insitu}}$ , however, shifted  
282 from zero in a negative direction at a rate of more than  $0.0020 \text{ yr}^{-1}$  for all three scenarios (Fig. 7b, d,  
283 f). This result implies that averaged over the whole country, the Japanese coast was acidified in winter  
284 to a degree that could be detected from the historical WPCL pH data, even with an uncertainty of  $\pm 0.1$ .  
285 The observed standard deviation for the maximum  $\text{pH}_{\text{insitu}}$  was also larger than the expected value of  
286  $0.0020 \text{ yr}^{-1}$  because of local variations in the pH trends. The average shift in the minimum  $\text{pH}_{\text{insitu}}$  data  
287 was smaller than  $0.0020 \text{ yr}^{-1}$ , but all three scenarios showed negative shifts in the average minimum  
288  $\text{pH}_{\text{insitu}}$  value (Fig. 7a, c, e).

289 We used Welch's t test to assess the direction of the average minimum and maximum  $\text{pH}_{\text{insitu}}$  trends.

290 For our null hypothesis, we assumed that the population of the trends with an average of  $-0.0014 \text{ yr}^{-1}$   
291 ( $-0.0024 \text{ yr}^{-1}$ ) and a standard deviation of  $0.0033 \text{ yr}^{-1}$  ( $0.0042 \text{ yr}^{-1}$ ) was sampled from a population  
292 with an average trend of  $0.0000 \text{ yr}^{-1}$  and a standard deviation of  $0.0020 \text{ yr}^{-1}$ . When the sample size  
293 was 289, the  $t$ -values and the degrees of freedom were 8.7 (6.2) and 412.2 (474.4), respectively. Since  
294 the  $p$  value was less than 0.001, the null hypothesis was rejected. Welch's  $t$  test confirmed that the  
295 average trends for both the minimum and maximum  $\text{pH}_{\text{insitu}}$  data were negative.

296 We also applied a paired  $t$ -test for the two trends calculated from the averaged minimum and  
297 maximum  $\text{pH}_{\text{insitu}}$  data, to verify whether two trends are significantly different. The population mean  
298 and the sample size were 0.0 and 289, respectively. Since the  $t$ -value was calculated to be 4.64 (the  
299 degrees of freedom = 288), the null hypothesis was rejected. The paired  $t$ -test suggested that the two  
300 trends calculated from the averaged minimum and maximum  $\text{pH}_{\text{insitu}}$  data are significantly different.

301

## 302 4.2 Possible influences on the $\text{pH}_{\text{insitu}}$ trends in coastal sea waters

303 To facilitate our discussion of the factors that influenced the  $\text{pH}_{\text{insitu}}$  trends, we used the conceptual  
304 models of acidification and basification in coastal sea waters of Sunda and Cai (2012) and Duarte et  
305 al. (2013), as follows:

$$306 \quad \text{pH}_{\text{insitu}} = \text{Function} (\text{D} (\text{T}), \text{DIC} (\text{Air CO}_2, \text{B} (\text{T}, \text{N})), \text{Alk}(\text{S})) \quad (2)$$

307 The  $\text{pH}_{\text{insitu}}$  varies with the ambient temperature (T) on seasonal, inter-annual, and decadal time scales  
308 mainly because of changes in the water dissociation constant in dissociation equilibrium (D);

309  $H_2O \leftrightarrow H^+ + OH^-$ ). Changes in dissolved inorganic carbon (DIC), alkalinity (Alk), and salinity (S)  
310 also affect the  $pH_{insitu}$  trends. The solubility pump, which is controlled mainly by the atmospheric  $CO_2$   
311 concentration (Air  $CO_2$ ;  $CO_2 + H_2O \leftrightarrow H^+ + HCO_3^-$ ), affects DIC, and ocean acidification occurs  
312 when the Air  $CO_2$  increases. Dissolved organic carbon can also be affected by biological processes (B)  
313 that depend on the ambient temperature (T) and the nutrient loading (N). There are contrasting  
314 relationships between DIC and N in heterotrophic and autotrophic oceans. In the waters where primary  
315 productivity is predominantly to organic decomposition (i.e., autotrophic water), N increase will  
316 enhance primary production and hence decrease DIC, causing basification. In the adjoining waters of  
317 this autotrophic water mass (for example, subsurface waters), however, N increase will arise increase  
318 of POC (Particle Organic Carbon) transport from the autotrophic water mass, and this leads increase  
319 of POC-decomposed DIC (i.e., heterotrophic water) and cause acidification (e.g., Sunda and Cai 2012;  
320 Duarte et al. 2013). Alkalinity (Alk) generally varies with salinity (S) in coastal oceans and might also  
321 affect the  $pH_{insitu}$  trend.

322 The DIC process (Air  $CO_2$ ) of ocean acidification in equation 2 generally occurred at all monitoring  
323 sites when the Air  $CO_2$  concentrations were horizontally uniform, resulting in overall negative trends  
324 in minimum and maximum  $pH_{insitu}$ . D (T) also has an overall trend of warming in Japan coastal area,  
325 and hence made some affections to the observed  $pH_{insitu}$  trend. Both the DIC (Air  $CO_2$ ) and D (T) could  
326 be associated with the global processes: ocean acidification and global warming, which were triggered  
327 by the increase of  $CO_2$  concentration in the global atmosphere. We will discuss about these global

328 effects focusing on the averages of the whole pH trends in Section 4.2.1.

329 Both DIC (B (T, N)) and Alk (S) are difficult to have general trends that covered all monitoring  
330 sites, because factors that control these variables (e.g., salinity of coastal water and terrestrial nutrient  
331 loading) have no common trends all over the Japan coast in this dataset. The WPCL data should contain  
332 stations of both autotrophic and heterotrophic oceans (Smith and Hollibaugh 1992), and this condition  
333 further obscure influence of DIC (B (T, N)) to overall  $\text{pH}_{\text{insitu}}$  trend, as the same trend of B (T, N) leads  
334 opposite trends of DIC (B (T, N)) in autotrophic and heterotrophic ocean (Duarte et al. 2013). Wide-  
335 varying nature of DIC (B (T, N)), and Alk (S) depending on the region might have caused the regional  
336 differences of  $\text{pH}_{\text{insitu}}$  trends among stations, contributing relatively large standard deviations of both  
337 the minimum and maximum  $\text{pH}_{\text{insitu}}$  trends (Fig. 7). We will discuss about these local effects associated  
338 with the regional differences in Section 4.2.2.

339

#### 340 4.2.1 Global effects on $\text{pH}_{\text{insitu}}$ trends

341 Our analysis was based on the  $\text{pH}_{\text{insitu}}$  data, so the difference between the trends might reflect long-  
342 term changes in water temperature that affected the dissociation constant (process D (T) in equation 2)  
343 or changes in the coastal carbon cycle (including absorption of anthropogenic carbon by the solubility  
344 pump, represented by DIC in equation 2) (process DIC (Air  $\text{CO}_2$ ) in equation 2). A part of D (T) and  
345 DIC (Air  $\text{CO}_2$ ) effects driven by ocean acidification and global warming could affect the all monitoring  
346 sites, and result in the trend distributions with negative shifts.



347 To evaluate the direct thermal effects related to process D (T) in equation 2, we estimated the pH  
348 values normalized to 25 deg. C (pH<sub>25</sub>), assuming that the minimum (maximum) pH<sub>insitu</sub> and highest  
349 (lowest) temperature and other parameters were measured at the same time. By assuming the other  
350 parameters that affected the pH calculation in the CO2sys (Lewis and Wallace 1998, csys.m), such as  
351 salinity, DIC, and alkalinity, did not change (these parameters are not measured as part of the WPCL  
352 program), we used the method of Lui and Chen (2017) to calculate the pH<sub>25</sub>, as follows:

$$353 \quad \text{pH}_{25} = -\text{pH}_{\text{insitu}} + a_1(T - 25 \text{ deg. C}), \quad (3)$$

354 where  $a_1$  is set to  $-0.015$  and  $T$  is the observed temperature.

355 The distributions of the trends in pH<sub>25</sub> after applying equation 3 are shown in Fig. 10. The minimum  
356 and maximum pH<sub>25</sub> data were normally distributed, meaning that the distributions of the pH<sub>insitu</sub> trends  
357 were maintained after applying equation 3 (Fig. 7e, f). The averages ( $\pm$  standard deviations) of the  
358 minimum and maximum pH<sub>25</sub> trends were  $-0.0010 \pm 0.0032$  and  $-0.0014 \pm 0.0041 \text{ yr}^{-1}$ , respectively.  
359 The averaged trends are consistent with those reported by Midorikawa et al. (2010), who calculated  
360 that pH<sub>25</sub> decreased at rates of  $-0.0013 \pm 0.0005 \text{ yr}^{-1}$  and  $-0.0018 \pm 0.0002 \text{ yr}^{-1}$  in summer and winter  
361 from 1983 to 2007 along the 137°E line of longitude in the north Pacific. The asymmetry of the pH<sub>25</sub>  
362 trends between minimum and maximum estimates would be related to the seasonal variations of pCO<sub>2</sub>  
363 and the associated asymmetric response of air-sea CO<sub>2</sub> flux (Landschutzer et al. 2018; Fassbender et  
364 al. 2018).

365 We also used Welch's t test to assess the direction of the averages of minimum and maximum pH<sub>25</sub>

366 trends, as same as applying it to the  $\text{pH}_{\text{insitu}}$  trends. The p value was calculated to be less than 0.001 in  
367 this case, so the null hypothesis was again rejected. Welch's t test confirmed that the average trends  
368 for both the minimum and maximum  $\text{pH}_{25}$  data were negative as well, suggesting that the DIC  
369 ( $\text{AirCO}_2$ ) effect (i.e. ocean acidification) caused negative shifts of the pH trend distribution after  
370 normalizing at 25 deg. C.

371 The  $\text{pH}_{25}$  and  $\text{pH}_{\text{insitu}}$  trends from north to south and from west to east were similar among the  
372 prefectures (Fig. 11), except in Miyagi and Tokushima. The trends in the minimum  $\text{pH}_{\text{insitu}}$  and summer  
373  $\text{pH}_{25}$  were quite similar, but the minimum and maximum  $\text{pH}_{\text{insitu}}$  trends tended to be more negative (by  
374 about  $-0.0010 \text{ yr}^{-1}$ ) than the corresponding  $\text{pH}_{25}$  trends, especially in Wakayama, Hiroshima, Kagawa,  
375 and Ehime, which met the threshold number of sampling sites.

376 The average highest temperatures observed at the minimum  $\text{pH}_{\text{insitu}}$  were close to 25 deg. C in the  
377 regions south of Chiba prefecture (Figs. 1 and 12a–d), so the normalization at 25 deg. C did not much  
378 affect the evaluation of the minimum  $\text{pH}_{25}$  in the southern prefectures. In contrast, the maximum  
379  $\text{pH}_{\text{insitu}}$  values were observed at temperatures that were more than 10 deg. lower than 25 deg. C, so the  
380 normalization worked well on the winter data. We estimated the temperature trends from the highest  
381 and lowest temperatures at the 289 sites that remained after quality control step 3. The trends in the  
382 highest and lowest temperatures generally indicated warming, with an average and standard deviation  
383 of  $0.021 \pm 0.040$  and  $0.047 \pm 0.036 \text{ deg. yr}^{-1}$ , respectively (Fig. 13). Estimations from the  $\text{CO}_2\text{sys}$   
384 indicate that these warming trends influenced the pH values and were related to the changes of  $-0.0004$

385 and  $-0.0010 \text{ yr}^{-1}$  in the pH trends in summer and winter, respectively (Fig. 7e–f and 10a–b).

386 We estimated that the  $\text{pH}_{\text{insitu}}$  would change from 8.0150 to 8.0147 in summer and from 8.2568 to  
387 8.2560 in winter, for temperature changes from 25.00 deg. to 25.02 deg., and from 10.00 deg. to 10.04  
388 deg., respectively, for a salinity of 34, DIC of 1900 millimol  $\text{m}^{-3}$ , and alkalinity of 2200 millimol  $\text{m}^{-3}$ .  
389 The differences between the  $\text{pH}_{\text{insitu}}$  and the corresponding  $\text{pH}_{25}$  trends in summer ( $-0.0004 \text{ yr}^{-1}$ ) and  
390 winter ( $-0.0010 \text{ yr}^{-1}$ ) can be partly explained by the difference between the decrease in the pH trends  
391 in summer ( $-0.0003 \text{ yr}^{-1}$ ) and winter ( $-0.0005 \text{ yr}^{-1}$ ) (Fig. 7e–f) arising from the thermal effects.

392

#### 393 4.2.2 Local effects on $\text{pH}_{\text{insitu}}$ trends

394 We found regional differences in  $\text{pH}_{\text{insitu}}$  values itself (e.g. Fig. 6) and  $\text{pH}_{\text{insitu}}$  trends (Figs. 8–9).  
395 The negative  $\text{pH}_{\text{insitu}}$  trends (acidification) were more significant in southwestern Japan than in  
396 northeastern Japan, especially for the minimum  $\text{pH}_{\text{insitu}}$  data (Fig. 9 and Section 3.2). The JMA (2008,  
397 2018) reported that over the past 100 years, the increase in water temperature in western Japan was  
398  $\sim 1.30 \text{ deg. C}$  greater than that in northeastern Japan.

399 We used CO2sys (Lewis and Wallace 1998) to predict how  $\text{pH}_{\text{insitu}}$  would change under a  
400 temperature difference of  $0.01 \text{ deg. C yr}^{-1}$  between the northeastern and southwestern areas, and found  
401 that pH decreased by  $0.0002 (0.0002) \text{ yr}^{-1}$  when the temperature changed from  $10.00 \text{ deg. C}$  to  $10.01$   
402  $\text{deg. C}$  ( $25.0 \text{ deg.}$  to  $25.01 \text{ deg. C}$ ), assuming a salinity of 34, DIC of 1900 millimol/ $\text{m}^3$ , and alkalinity  
403 of 2200 millimol/ $\text{m}^3$ . The contrasting trends in the northeast and southwest can be also partly explained

404 by the difference in warming trends (process D (T) in equation 2).

405 The summer  $\text{pH}_{\text{insitu}}$  is affected by ocean uptake of  $\text{CO}_2$  (process DIC; Bates et al. 2012; Bates 2014)  
406 through long-term changes in biological activity (Cai et al. 2011; Sunda and Cai 2012; Duarte et al.  
407 2013; Yamamoto-Kawai et al. 2015) as well as the effect of changes in the dissociation constant. The  
408 responses of  $\text{pH}_{\text{insitu}}$  to changes in marine productivity are, however, complicated.

409 Previous studies have reported that nutrient loadings in Japan have decreased over recent decades  
410 (e.g., Yamamoto-Kawai et al. 2015; Kamohara et al. 2018; Nakai et al. 2018), with variable effects on  
411 summer  $\text{pH}_{\text{insitu}}$  in coastal sea waters. TN was monitored for a shorter period than  $\text{pH}_{\text{insitu}}$  (1995 to  
412 2009). We assumed that the TN was mainly dissolved inorganic nitrogen, and determined the  
413 correlations between TN and the minimum and maximum  $\text{pH}_{\text{insitu}}$  data (Fig. 14). There were significant  
414 negative correlations between TN and minimum ( $-0.30$ ) and maximum ( $-0.29$ )  $\text{pH}_{\text{insitu}}$ . These  
415 correlations apparently imply that the conditions in most of the monitoring areas of the WPCL  
416 programs were heterotrophic. This results also implies that recent decrease of TN loadings had partly  
417 offset anthropogenic  $\text{CO}_2$ -induced pH decrease in coastal sea waters. However, we should also be  
418 careful about the possibility that this may be a result of simultaneous progress of independent two  
419 things (i.e., anthropogenic carbon uptake of ocean and decrease of TN loadings in Japan).

420 Nakai et al. (2018) reported that nutrient loadings have decreased in the most parts of the Seto Inland  
421 Sea from 1981 to 2010, but several areas remain eutrophic. Because of geographical variations in  
422 nutrient loadings and the uneven distribution of autotrophic and heterotrophic water areas, there are

423 significant spatial variations in pH trends in the Seto Inland Sea (Fig. 8). The pH trends in coastal areas  
424 of western Kyushu, where the anthropogenic nutrient loadings are relatively low, therefore reflect the  
425 decreases in nutrient discharges, resulting in variations between regions (e.g., Nakai et al. 2018;  
426 Yamamoto and Hanazato 2015; Tsuchiya et al., 2018). Several cities in this area have introduced  
427 advanced sewage treatment to prevent eutrophication in coastal sea waters (Nakai et al. 2018;  
428 Yamamoto and Hanazato 2015).

429 **Regional variations** in coastal alkalinity along with salinity might be related to changes in land use  
430 and might affect the trends (process Alk(S) in equation 2). Taguchi et al. (2009) measured alkalinity in  
431 the surface waters of Ise, Tokyo, and Osaka bays between 2007 and 2009, and reported that total  
432 alkalinity was highly correlated with salinity in each bay. For a temperature, salinity, dissolved carbon,  
433 and alkalinity of 25.00 deg. C, 35, 1900 millimol m<sup>-3</sup>, and 2300 millimol m<sup>-3</sup>, respectively, pH<sub>insitu</sub> (=   
434 pH<sub>25</sub>) was estimated at 8.1416 using the CO2sys (Lewis and Wallace 1998). By changing the salinity  
435 and alkalinity to 34 and 2200 millimol m<sup>-3</sup>, respectively, pH<sub>insitu</sub> (= pH<sub>25</sub>) decreased by 0.0081 to  
436 8.0150. This shows that pH could deviate significantly from average trends if the inputs of alkaline  
437 compounds are changed; consequently, some of our pH trends could have been affected by changing  
438 discharge from different land-use types.

439 Regional differences in pH<sub>insitu</sub> trends in coastal sea waters might be caused by ocean pollution. The  
440 speciation and bioavailability of heavy metals change in acidic waters, causing an increase in the  
441 biotoxicity of the metals (Zeng et al. 2015; Lacoue-Labarthe et al. 2009; Pascal et al. 2010; Cambell

442 et al. 2014). The rates at which marine organisms photosynthesize and respire in ocean waters decrease  
443 and increase, respectively, in water polluted with heavy metals and oils (process DIC in equation 2)  
444 because of biotoxicity and eutrophication, thereby resulting in acidification (Hing et al. 2011; Huang  
445 et al. 2011; Gilde and Pinckney 2012).

446

## 447 5. Conclusions

448 We estimated the long-term trends in  $\text{pH}_{\text{insitu}}$  in Japanese coastal sea waters and examined how the  
449 trends varied regionally. The long-term  $\text{pH}_{\text{insitu}}$  data show highly variable trends, although ocean  
450 acidification has generally intensified in Japanese coastal sea waters. We found that the annual  $\text{pH}_{\text{insitu}}$   
451 minimum (in summer) and  $\text{pH}_{\text{insitu}}$  maximum (in winter) decreased at overall rates of  $-0.0014$  and  
452  $-0.0024 \text{ yr}^{-1}$ , respectively, in Japanese coastal sea waters. The averages of the minimum and maximum  
453  $\text{pH}_{25}$  trends were  $-0.0010$  and  $-0.0014 \text{ yr}^{-1}$ , respectively. The differences between the  $\text{pH}_{\text{insitu}}$  and the  
454 corresponding  $\text{pH}_{25}$  trends in summer ( $-0.0004 \text{ yr}^{-1}$ ) and winter ( $-0.0010 \text{ yr}^{-1}$ ) can be partly explained  
455 by the thermal effects. The negative shifts of the  $\text{pH}_{25}$  trend distributions suggest a signal of ocean  
456 acidification in Japanese coastal sea water.

457 There were striking spatial variations in the  $\text{pH}_{\text{insitu}}$  trends. Correlations among the  $\text{pH}_{\text{insitu}}$  time series  
458 at different sites revealed that the high variability in the  $\text{pH}_{\text{insitu}}$  trends was not caused by analytical  
459 errors in the data but reflected the large spatial variability in the physical and chemical characteristics  
460 of coastal environments, such as water temperature, nutrient loadings, and autotrophic/heterotrophic

461 conditions. While there was a general tendency towards coastal acidification, there were positive trends  
462 in  $\text{pH}_{\text{insitu}}$  at 25%–30% of the monitoring sites, indicating basification, which suggests that the coastal  
463 environment might not be completely devastated by acidification. If we can manage the coastal  
464 environment effectively (e.g., control nutrient loadings and autotrophic/heterotrophic conditions), we  
465 might be able to limit, or even reverse, acidification in coastal areas.

466

## 467 Acknowledgments

468 We thank the scientists, captain, officers, and personnel of the National Institute for Environmental  
469 Studies, Regional Development Bureau of the Ministry of Land, Infrastructure, Transport and Tourism,  
470 who contributed to this study. We acknowledge financial support from the Sasakawa Peace Foundation  
471 of the Ocean Policy Research Institute. We also appreciate discussions with members of the  
472 Environmental Variability Prediction and Application Research Group of the Japanese Agency for  
473 Marine-Earth Science and Technology. Suggestions by two reviewers helped us to improve an earlier  
474 version of the manuscript.

475

## 476 References

- 477 Bates, N. R.: Interannual variability of the ocean  $\text{CO}_2$  sink in the subtropical gyre of the North Atlantic  
478 Ocean over the last 2 decades, *J. Geophys. Res.* 112, C09013, doi:10.1029/2006JC003759, 2007.
- 479 Bates, N. R.: Multi-decadal uptake of carbon dioxide into subtropical mode waters of the North  
480 Atlantic Ocean. *Biogeosciences* 9:2, 649–2, 659, <http://dx.doi.org/10.5194/bg-9-2649-2012>, 2012.
- 481 Bates, N. R., Astor, Y. M., Church, M. J., Currie, K., Dore, J. E., Gonzalez-Davila, M., Lorenzoni, L.,

482 Muller-Karger, F., Olafsson, J., and Santana-Casiano, J. M.: A time-series view of changing surface  
483 ocean chemistry due to ocean uptake of anthropogenic CO<sub>2</sub> and ocean acidification, *Oceanography*,  
484 27 (1):126–141, <http://dx.doi.org/10.5670/oceanog.2014.16>, 2014.

485 Bednarsek, N., Tarling, G. A., Bekker, D. C. E., Fielding, S., Jones, E. M., Venables, H. J., Ward, P.,  
486 Kuzirian, A., Leze, B., Feely, R. A., and Murphy, E. J.: Extensive dissolution of live pteropods in  
487 the Southern Ocean, *Nature Geoscience Letter*, 5, 881–885, doi: 10.1038/NGEO1635, 2012.

488 Bednarsek, N., Feely, R. A., Reum, J. C. P., Peterson, B., Menkel, J., Alin, S. R., and Hales, B.:  
489 *Limacina helicina* shell dissolution as an indicator of declining habitat suitability due to ocean  
490 acidification in the California Current Ecosystem, *Proc. R. Soc. B*, 281 20140123, doi:  
491 10.1098/rspb.2014.0123, 2014.

492 Borges, A. V. and Gypen, N.: Carbonate chemistry in the coastal zone responds more strongly to  
493 eutrophication than to ocean acidification, *Limnology and Oceanography* 55: 346–353, 2010.

494 Montagna, R.: Description and quantification of pteropod shell dissolution: a sensitive bioindicator of  
495 ocean acidification, *Global Change Biology*, 18, 2378–2388, doi: 10.1111/j.1365–2486.2012.02668,  
496 2012.

497 Byrne, M., Lamare, M., Winter, D., Dworjanyn, S. A., and Uthicke, S.: The stunting effect of a high  
498 CO<sub>2</sub> ocean on calcification and development in the urchin larvae, a synthesis from the tropics to the  
499 poles, *Philosophical Transactions of the Royal Society B*, 368, 20120439. Doi:  
500 10.1098/rstb.2012.0439, 2013.



501 Cai ,W., Hu, X., Huang, W., Murell, M. C., Lehrter, J. C., Lohrenz, S. E., Chou, W., Zhai, W.,  
502 Hollibaugh, J. T., Wang, Y., Zhao, P., Guo, X., Gundersen, K., Dai, M., and Gong, G.: Acidification  
503 of subsurface coastal waters enhanced by eutrophication, *Nature Geoscience*, 4, 766–700, 2011.

504 Campbell, A. L., Mangan, S., Ellis, R. P., and Lewis, C.: Ocean acidification increases copper toxicity  
505 to the early life history stages of the polychaete *arenicola marina* in artificial seawater, *Environ. Sci.*  
506 *Technol.* 48, 9745–9753, 2014.

507 Challenger, R. C., Robbins, L. L., and McClintock, J. B.: Variability of the carbonate chemistry in a  
508 shallow, seagrass-dominated ecosystem: implications for ocean acidification experiments, *Marine*  
509 *and Freshwater Research*, 67, 163–172. Doi:10.1071/MF14219, 2016.

510 DOE (United States Department of Energy): Handbook of methods for the analysis of the various  
511 parameters of the carbon dioxide system in sea water; ver. 2, edited by A. G. Dickson and C. Goyet,  
512 ORNL/CDIAC-74, 1994.

513 Dore, J. E., Lukus, R., Sadler, D. W., Church, M. J. and Karl, D. M.: Physical and biogeochemical  
514 modulation of ocean acidification in the central North Pacific, *Proc. Natl. Acad. Sci.* 106, 12 235–12  
515 240, 2009.

516 Doney, S.C., Fabry, V. J., Freely, A., and Kleypas, J. A.: Ocean acidification: The other CO<sub>2</sub> program,  
517 *Annu. Rev. Mar. Sci.*, 1, 169–192, 2009.

518 Duarte, C. M., Hendriks, I. E., Moore, T. S., Olsen, Y. S., Steckbauer, A., Ramajo, L., Carstensen, J.,  
519 Trotter, J. A., and McCullough, M.: Is ocean acidification an open ocean syndrome? Understanding  
520 anthropogenic impacts in seawater pH, *Estuaries and Coasts* 36, 221–236.doi:10.1007/s12237-013-  
521 9594-3, 2013.

522 [Fassbender J. A., Rodgers B. K., Palevsky I. H., and Sabine L. C.: Seasonal asymmetry in the evolution  
523 of surface ocean pCO<sub>2</sub> and pH thermodynamic drivers and the influence on sea-air CO<sub>2</sub> flux, \*Global  
524 Biogeochemical Cycles\*, 32, 11476–1497, 2018.](#)

525 Frankignoulle, M., and Bouquegneau, J. M.: Daily and yearly variations of total inorganic carbon in a  
526 productive coastal area, *Estuarine, Coastal and Shelf Science* 30, 79–89, 1990.

527 Gattuso, J. P., and Hansson, L.: *Ocean acidification*, Oxford Univ. Press, Oxford, 2011.

528 Glide, K., and Pinckney, J. L.: Sublethal effects of crude oil on the community structure of estuarine  
529 phytokton, *Estuar. Coasts* 35, 853–861, 2012.

530 Gonzalez-Davila, M., Santana-Casiano, J. M., and Gonzalez-Davila, E. F.: Interannual variability of  
531 the upper ocean carbon cycle in the northeast Atlantic Ocean, *Geophys. Res. Lett.* 34, L07608,  
532 doi:10.1029/2006GL028145, 2007.

533 Hagens, M., Slomp, C. P., Meysman, F. J. R., Seitaj, D., Harlay, J., Borges, A. V., and Middelburg, J.  
534 J.: Biogeochemical processes and buffering capacity concurrently affect acidification in a seasonally  
535 hypoxic coastal marine basin, *Biogeoscience* 12, 1561–1583. Doi:10.5194/bg-12-1561-2015, 2015.

536 Hing, L. S., Ford, T., Finch, P., Crane, M., and Morritt, D.: Laboratory stimulation of oil-spill effects  
537 on marine phytoplankton, *Aquat. Toxicol* 103, 32–37, 2011.

538 Huang, Y. J., Jiang, Z. G., Zeng, J. N., Chen, Q. Z., Zhao, Y. Q., Liao, Y. B., Shou, L., and Xu, X. Q.:  
539 The chronic effects of oil pollution on marine phytoplankton in a subtropical bay, China. *Environ.*  
540 *Monit. Assess.* 176, 517–530, 2011.

541 Intergovernmental Panel on Climate Change (IPCC): Climate Change 2013: The Physical Science  
542 Basis. Contribution of Working Group I to the Fifth Assessment Report of the Intergovernmental  
543 Panel on Climate Change, ed. Stocker, T. F., Qin, D., Plattner, Gian-Kasper., Tignor, M. M. B., Allen,  
544 S. K., Boschung, J., Nauels, A., Zia Y., Bex, V., Midgley, P. M., 1–1535 pp. Cambridge,  
545 UK: Cambridge University Press, Cambridge, United Kingdom and New York, NY, USA, 2013.

546 Japanese Industrial Standard Z8802 : <http://kikakurui.com/z8/Z8802-2011-01.html> (in Japanese), 2011.

547 Japanese Meteorological Agency :

548 [http://dl.ndl.go.jp/view/download/digidepo\\_3011050\\_po\\_synthesis.pdf?itemId=info%3Andljp%2F](http://dl.ndl.go.jp/view/download/digidepo_3011050_po_synthesis.pdf?itemId=info%3Andljp%2Fpid%2F3011050&contentNo=1&alternativeNo=&_lang=en)  
549 [pid%2F3011050&contentNo=1&alternativeNo=&\\_lang=en](http://dl.ndl.go.jp/view/download/digidepo_3011050_po_synthesis.pdf?itemId=info%3Andljp%2Fpid%2F3011050&contentNo=1&alternativeNo=&_lang=en), 2008.

550 Japanese Meteorological Agency :

551 [https://www.data.jma.go.jp/kaiyou/data/shindan/a\\_1/japan\\_warm/japan\\_warm.html](https://www.data.jma.go.jp/kaiyou/data/shindan/a_1/japan_warm/japan_warm.html) (in Japanese),  
552 2018.

553 Kamohara, S., Takasu, Y., Yuguchi, M., Mima, N., and Yoshunari, A.: Nutrient decrease in Mikawa  
554 Bay, *Bulletin of Aichi Fisheries Research Institute* 23, 30–32. (in Japanese), 2018.

555 Keeling, C. D., and Whorf, T. P.: Atmospheric CO<sub>2</sub> concentration—Manoa Loa Observatory, Hawaii,  
556 1958-1997 (revised August 1998), ORNL NDP-001, Oak Ridge Natl. Lab. Oak Ridge, TN, 1998.

557 Lacou-Labarthe, T., Martin, S., Oberhansli, F., Teyssie, J. L., Jeffree, R., Gattuso, J. P., and  
558 Bustamante, P.: Effects of increased pCO<sub>2</sub> and temperature on tracer element (Ag, Cd and Zn)  
559 bioaccumulation in the eggs of the common cuttlefish, *Sepia officinalis*. *Biogeosciences* 6,  
560 2561–2573, 2009.

561 [Landschutzer P, Gruber N, Bakker C. E. D., Stemmler I, Six D. K.: Strengthening seasonal marine](#)  
562 [CO<sub>2</sub> variations due to increasing atmospheric CO<sub>2</sub>. \*Nature Climate Change\*, 8, 146–150, 2018.](#)

563 Lemasson, A. J., Fletcher, S., Hall-Spence, J. M., and Knights, A. M.: Linking the biological impacts  
564 of ocean acidification on oysters to changes in ecosystem services: A review, *Journal of Experimental*  
565 *Marine Biology and Ecology*, 492, 49–62, 2017.

566 Lewis, E., and Wallace, D. W. R.: Program Developed for CO<sub>2</sub> System Calculations. ORNL/CDIAC-  
567 105. Carbon Dioxide Information Analysis Center, Oak Ridge National Laboratory, U.S. Department  
568 of Energy, Oak Ridge, Tennessee, 1998.

569 Luenberger, D. G.: Optimization by vector space methods, pp. 1-326, John Wiley & Sons, Inc., New  
570 York, N.Y, 1969.

571 Lui, H., and Chen, A. C.: Reconciliation of pH<sub>25</sub> and pH<sub>insitu</sub> acidification rates of the surface oceans:  
572 A simple conversion using only in situ temperature, *Limnology and Oceanography: methods*, 15,  
573 328–355, doi:1002/lom3.10170, 2017.

574 Midorikawa, T., Ishii, M., Sailto, S., Sasano, D., Kosugi, N., Motoi, T., Kamiya, H., Nakadate, A.,  
575 Nemoto, K., and Inoue, H.: Decreasing pH trend estimated from 25-yr time series of carbonate  
576 parameters in the western North Pacific, *Tellus*, 62B, 649–659, doi:  
577 10.1111/j.1600–0889.2010.00474.x, 2010.

578 Ministry of the Environment: <http://www.env.go.jp/hourei/05/000140.html> (in Japanese), 2018.

579 Nakai, S., Soga, Y., Sekito, S., Umehara, S., Okuda, T., Ohno, M., Nishijima, W., and Asaoka, S.:  
580 Historical changes in primary production in the Seto Inland Sea, Japan, after implementing  
581 regulations to control the pollutant loads, *Water Policy* wp2018093. Doi:10.2166/wp.2018.093, 2018.

582 National Institute for Environmental Studies :  
583 [https://www.nies.go.jp/igreen/explain/water/content\\_w.html](https://www.nies.go.jp/igreen/explain/water/content_w.html) (in Japanese), 2018.

584 Olafsson, J., Olafsdottir, S. R., Benoit-Cattin, A., Danielsen, M., Arnarson, T. S., and Takahashi, T.:  
585 Rate of Iceland Sea acidification from time series measurements, *Biogeosciences* 6:2, 661–2, 668,  
586 <http://dx.doi.org/10.5194/bg-6-2661-2009>, 2009.

587 Pascal, P. Y., Fleeger, J. W., Galvez, F., and Carman, K. R.: The toxicological interaction between ocean  
588 acidity and metals in coastal meiobenthic copepods, *Mar. Pollut. Bull*, 60, 2201–2208, 2010.

589 Sarmiento, J. L., and Gruber, N.: *Ocean Biogeochemical dynamics*, pp. 1-503, Princeton Univ. Press,  
590 Princeton, New Jersey; Oxfordshire, United Kingdom, 2006.

591 [Smith, S.V., and Hollibaugh, J. T.: Coastal metabolism and the oceanic carbon balance. Review of](#)  
592 [Geophysics](#), 31, 75-89, 1993.

593 Sunda, W. G., and Cai, W. J.: Eutrophication induced CO<sub>2</sub>-acidification of subsurface coastal waters:  
594 interactive effects of temperature, salinity, and atmospheric pCO<sub>2</sub>, *Environ. Sci. Technol.* 46,  
595 10651–10659, 2012.

596 Taguchi, F., Fujiwara, T., Yamada, Y., Fujita, K., and Sugiyama, M.: Alkalinity in coastal seas around  
597 Japan, *Bulletin on coastal oceanography*, Vol.47, No.1, 71–75, 2009.

598 Yamamoto-Kawai, M., Kawamura, N., Ono, T., Kosugi, N., Kubo, A., Ishii, M., and Kanda, J.: Calcium  
599 carbonate saturation and ocean acidification in Tokyo Bay, Japan, *J. Oceanogr.* 71:427–439, doi  
600 10.1007/s10872-015-0302-8, 2015.

601 Tsuchiya, K., Ehara, M., Yasunaga, Y., Nakagawa, Y., Hirahara, M., Kishi, M., Mizubayashi, K.,  
602 Kuwahara, V. S., and Toda, T.: Seasonal and Spatial Variation of Nutrients in the Coastal Waters  
603 of the Northern Goto Islands, Japan, *Bulletin on coastal oceanography*, 55, 125-138. (in  
604 *Japanese*), 2018.

605 Yamamoto, T., and Hanazato, T.: Eutrophication problems of oceans and lakes, -fishes cannot live in  
606 clean water, pp. 1–208, ChijinShokan Co. Ltd, ISBN978-4-8052-0885-4, (in Japanese), 2015.

607 Yara, Y., Vogt, M., Fujii, M., Yamano, H., Hauri, C., Steinacher, M., Gruber, N. and Yamano, Y. : Ocean  
608 acidification limits temperature-induced poleward expansion of coral habitats around Japan,  
609 *Biogeosciences*, 9, 4955–4968, doi : 10.5194/bg-9-4955-2012, 2012.

610 Zeng, X., Chen, X., and Zhuang, J.: The positive relationship between ocean acidification and pollution,  
611 *Mar. Poll. Bull.* 91, 14–21, 2015.

612 Wakita, M., Nagano, A., Fujiki, T., and Watanabe, S.: Slow acidification of the winter mixed layer in  
613 the subarctic western North Pacific, *J. Geophys. Res. Oceans*, 122, 6923–6935,  
614 doi:10.1002/2017JC013002, 2017.  
615

616 Figure captions

617

618 Fig. 1 Coastal maps and monitoring sites in Japan. Red points in (a) indicate the fixed sites ( $n = 1481$ )  
619 monitored by the Regional Development Bureau of the Ministry of Land, Infrastructure, Transport,  
620 and Tourism, and the Ministry of the Environment (Japan) under the WCPL monitoring program. (b)  
621 Monitoring sites that met the strictest criterion ( $n = 302$ ).

622

623 Fig. 2 Distributions of the monthly number of data points ( $N$ ) for (a) maximum and (b) minimum  
624 temperatures collected in each prefecture from the 302 most reliable monitoring sites.

625

626 Fig. 3 Examples of (a) acidification (Kahoku Coast in Ishikawa) and (b) basification (Funakoshi Bay  
627 in Iwate) trends at monitoring sites. Blue and red colors indicate the annual minimum and maximum  
628  $\text{pH}_{\text{insitu}}$  data and their trends, respectively.

629

630 Fig. 4 Correlations of water temperature and  $\text{pH}_{\text{insitu}}$  at adjacent monitoring sites in the same prefecture.  
631 Thin lines denote significant correlations ( $r = 0.12$ , degrees of freedom = 283).

632

633 Fig. 5 Scatter plots of correlation coefficients for water temperature and  $\text{pH}_{\text{insitu}}$  at adjacent monitoring  
634 sites in the same prefecture. Fig. 5a is for the highest temperature and the minimum  $\text{pH}_{\text{insitu}}$  data and



635 Fig. 5b for the lowest temperature and maximum  $\text{pH}_{\text{insitu}}$  data, respectively.

636

637 Fig. 6 Examples of time-series for annual minimum and maximum  $\text{pH}_{\text{insitu}}$  data at adjacent monitoring  
638 sites close to the boundaries between (a) Osaka and Hyogo and (b) Kagawa and Ehime. Lines of the  
639 same color indicate data collected at the same site. **Thin and bold lines indicate the annual minimum  
640 and maximum  $\text{pH}_{\text{insitu}}$  data, respectively, at each monitoring sites.** Site locations are included to the  
641 right of each panel, with the text color corresponding to the colors in each panel.

642

643 Fig. 7 Histogram of pH trends, represented by  $\Delta\text{pH}_{\text{insitu}}$ , showing the slopes of the linear regression  
644 lines for the annual minimum (left) and maximum (right)  $\text{pH}_{\text{insitu}}$  data at each monitoring site. The  
645 histograms in (a, b), (c, d), and (e, f) show three scenarios: (a, b) all 1481 available sites with  
646 continuous records before quality control, (c, d) 1127 sites without outliers, and (e, f) 289 sites that  
647 meet the strictest criterion.

648

649 Fig. 8 Distributions of long-term trends in  $\text{pH}_{\text{insitu}}$  ( $\Delta\text{pH}_{\text{insitu}}/\text{yr}$ ) in Japanese coastal **sea** waters. The  
650 colors indicate the ranges of acidification (a, c) and basification (b, d). (a, b) and (c, d) are linked to  
651 the data used in Figs. 7e and 7f, respectively.

652

653 Fig. 9 (a–b, d–e, g–h, j–k) Average minimum and maximum  $\text{pH}_{\text{insitu}}$  trends ( $\Delta\text{pH}_{\text{insitu}}/\text{yr}$ ) in each

654 prefecture. These figures show each side of the Pacific (a–b), the Seto Inland Sea (d–e), the East  
655 China Sea (g–h), and the Japan Sea (j–k). The prefecture names are arranged vertically from eastern  
656 (northern) to western (southern) areas. Black shading indicate one standard deviation from the  
657 average. (c, f, i, l) Number of monitoring sites in each prefecture and the thin dashed line is the  
658 threshold value of 17 (i.e., the average number of monitoring sites in all prefectures). The prefectures  
659 that meet the threshold are indicated in purple. The figure is based on the results shown in Figs. 7 (e,  
660 f) and 8.

661

662 Fig. 10 Same as Fig. 7, but showing the  $\text{pH}_{25}$  trends at 289 sites (selected by quality control step 3).

663 The value of  $\text{pH}_{25}$  was estimated using the method of Lui and Chen (2017).

664

665 Fig. 11 (a–b, d–e, g–h, j–k) Same as Fig. 9, but showing the average estimated minimum and  
666 maximum  $\text{pH}_{25}$  trends ( $\Delta\text{pH}_{25}/\text{yr}$ ) for each prefecture. Red lines and points indicate the average  
667 minimum and maximum  $\text{pH}_{\text{insitu}}$  trends shown in Fig. 9.

668

669 Fig. 12 Average highest and lowest temperatures observed for the minimum and maximum  $\text{pH}_{\text{insitu}}$  data  
670 for each prefecture. The blue and red lines and shading indicate the average and one standard  
671 deviation from the average, respectively. The prefectures that met the threshold of 17 are shown in  
672 purple, as in Figs. 9 (c–l) and 11 (c–l).

673

674 Fig. 13 Same as Fig. 7, but showing the highest and lowest temperature trends at 289 sites (selected  
675 by quality control step 3).

676

677 Fig. 14 Correlation between trends in total nitrogen (TN) and trends in (a) minimum and (b) maximum  
678  $\text{pH}_{\text{insitu}}$ . The correlation coefficients are  $-0.30$  and  $-0.29$  for the minimum and maximum  $\text{pH}_{\text{insitu}}$ ,  
679 respectively (significance level of 0.05,  $r = 0.128$ ; degrees of freedom = 236).

680

681 Table 1 Number of samples (N) collected at each of the 1481 monitoring sites each year.

682

683 Table 2 Average mutual correlation coefficients among water temperature and  $\text{pH}_{\text{insitu}}$  measurements at  
684 adjacent monitoring sites in the same prefecture. The averages were calculated from the data for the  
685 highest and lowest temperature, and minimum and maximum  $\text{pH}_{\text{insitu}}$  within 15 km for the three  
686 criteria. We refined the sites using three quality control steps, yielding 1481 (step 1), 1127 (step 2),  
687 and 302 (step 3) sites. [Two right columns represent a significant level of 5% and a degree of freedom  
688 for the correlation coefficients of each quality check procedure.](#)

689

690 Table 3 Average correlation coefficients between minimum and maximum  $\text{pH}_{\text{insitu}}$  trends and total  
691 inorganic nitrogen (TN) ones, respectively. We evaluated this for the data after each quality check

692 procedure. Degrees of freedom in step 1 and 2 are same values, because TN data are not necessarily  
693 measured at the whole of  $pH_{\text{insitu}}$  monitoring sites. The sampling number of monitoring sites at step 1  
694 and 2 were therefore the same number. Significant levels of 5% and degrees of freedom are also  
695 represented.



(a) For maximum temperature

(b) For minimum temperature

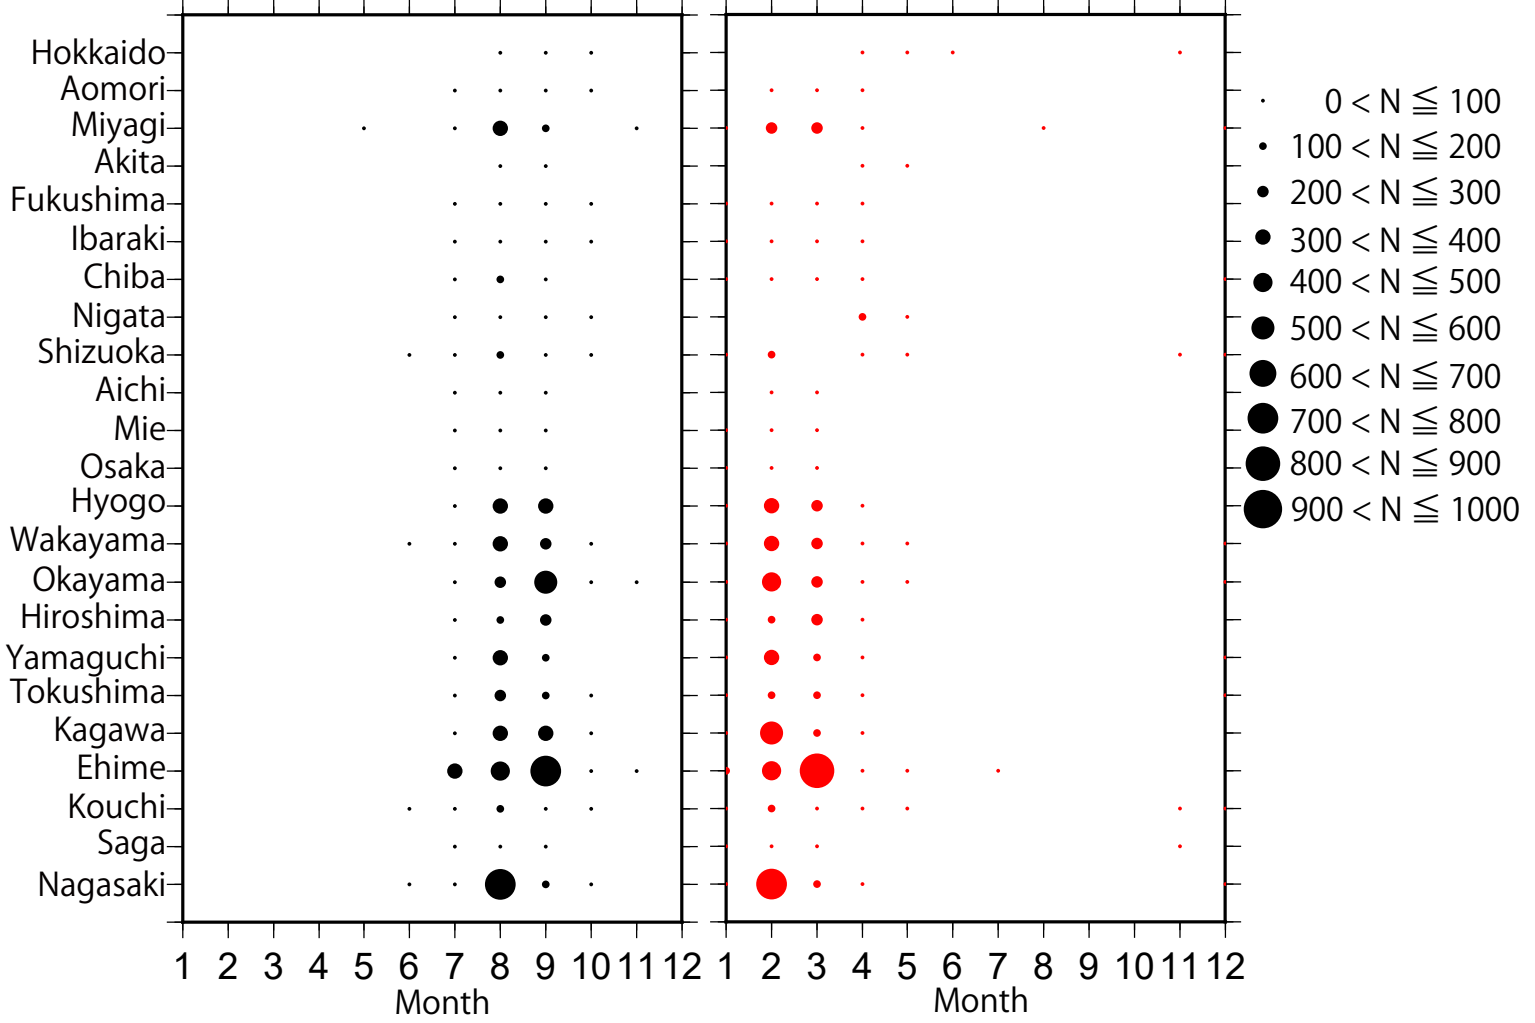

Fig. 2 Distributions of the monthly number of data points (N) for (a) maximum and (b) minimum temperatures collected in each prefecture from the 302 most reliable monitoring sites.

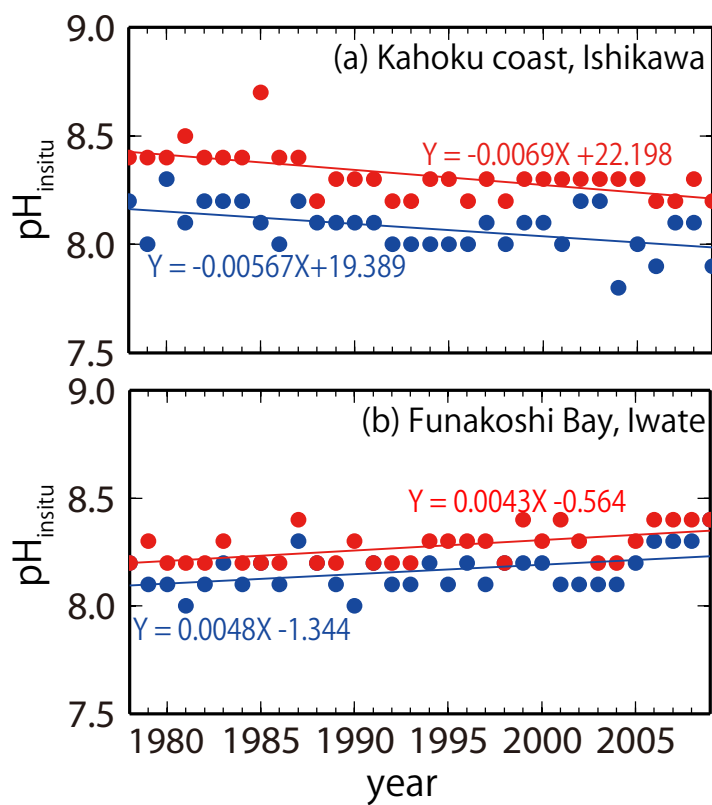

Fig. 3 Examples of (a) acidification (Kahoku Coast in Ishikawa) and (b) basification (Funakoshi Bay in Iwate) trends at monitoring sites. Blue and red colors indicate the annual minimum and maximum pH<sub>insitu</sub> data and their trends, respectively.

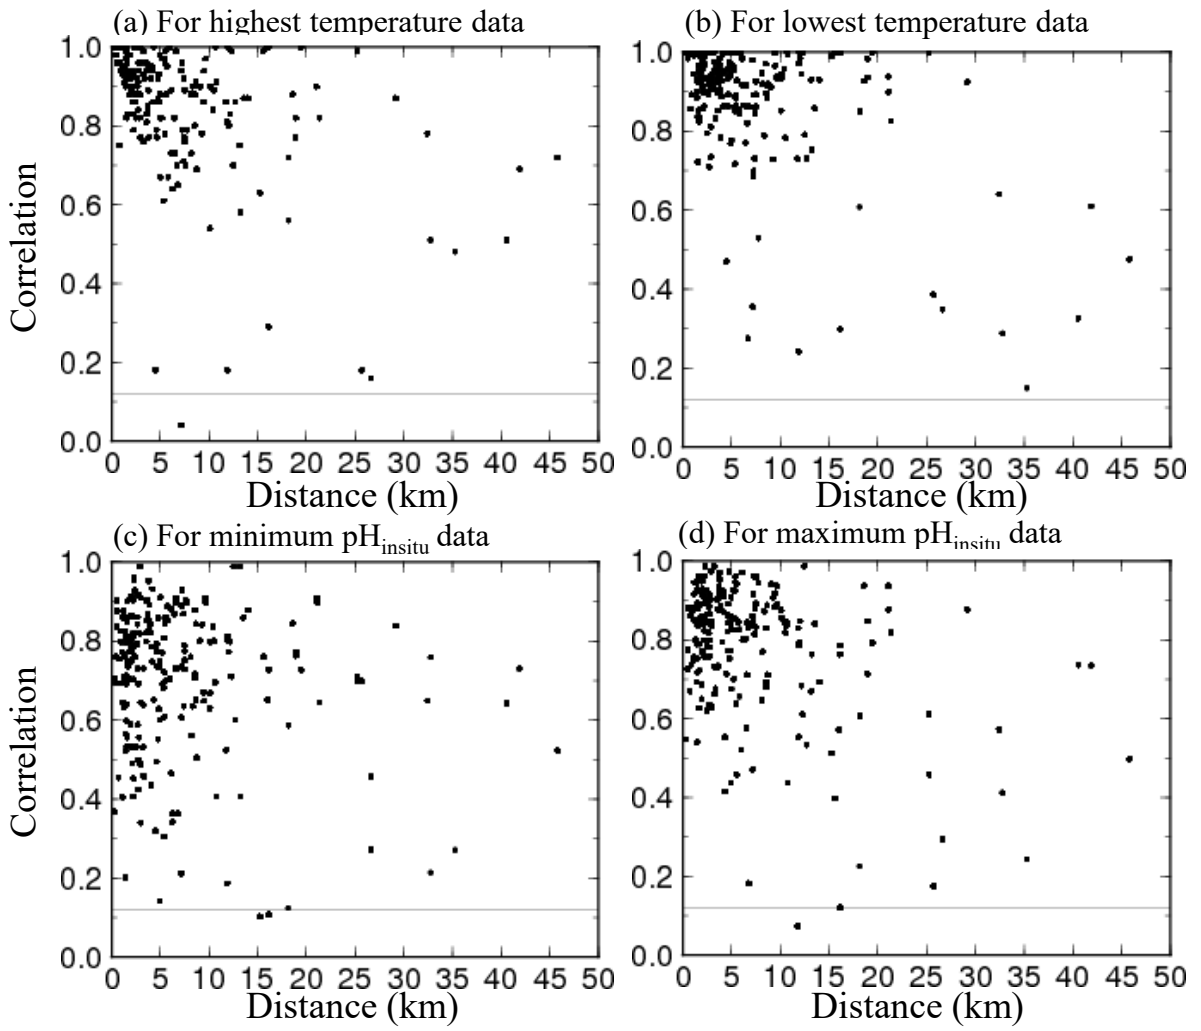

Fig. 4 Correlations of water temperature and  $\text{pH}_{\text{in situ}}$  at adjacent monitoring sites in the same prefecture. Thin lines denote significant correlations ( $r = 0.12$ , degrees of freedom = 283).



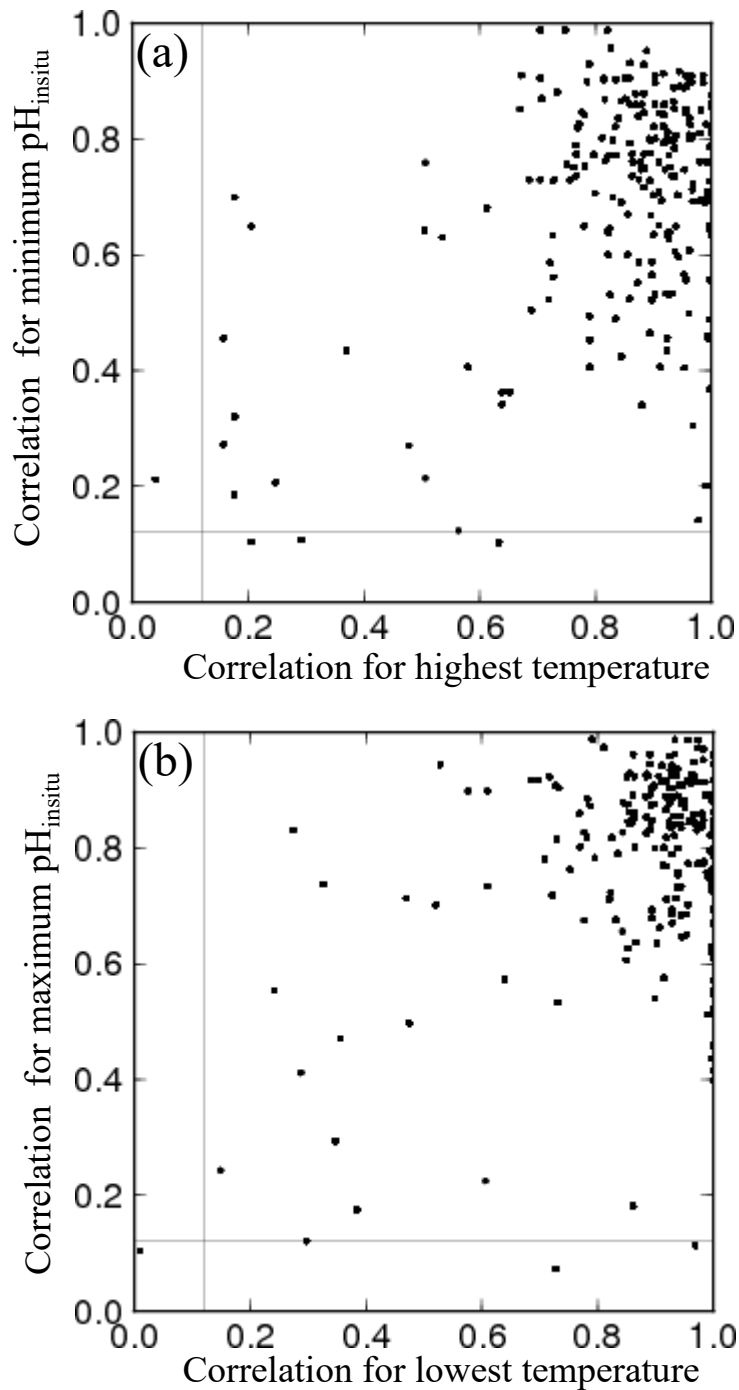

Fig. 5 Scatter plots of correlation coefficients for water temperature and  $\text{pH}_{\text{in situ}}$  at adjacent monitoring sites in the same prefecture. Fig. 5a is for the highest temperature and the minimum  $\text{pH}_{\text{in situ}}$  data and Fig. 5b for the lowest temperature and the maximum  $\text{pH}_{\text{in situ}}$  data, respectively.

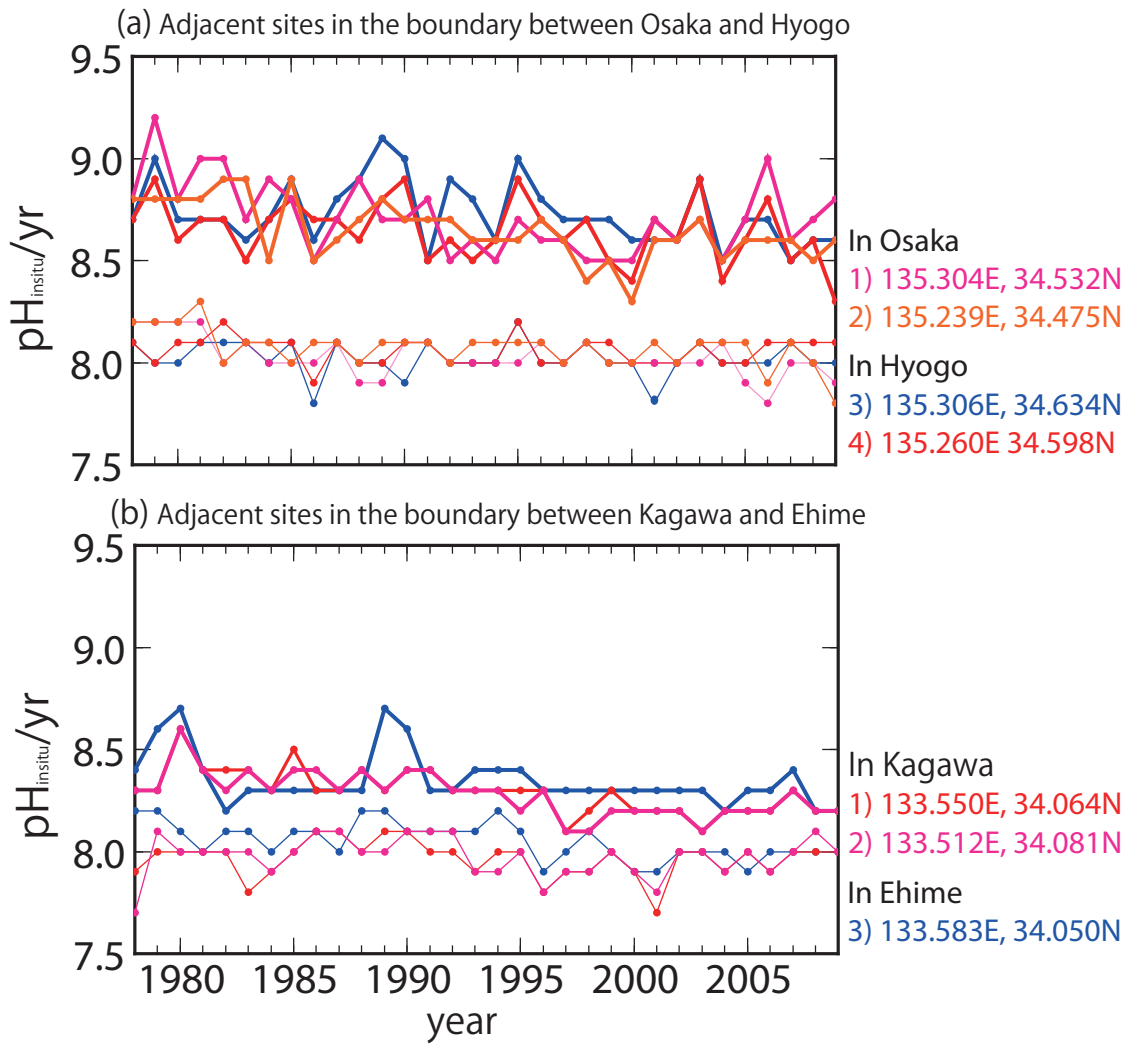

Fig. 6 Examples of time-series for annual minimum and maximum  $\text{pH}_{\text{in situ}}$  data at adjacent monitoring sites close to the boundaries between (a) Osaka and Hyogo and (b) Kagawa and Ehime. Lines of the same color indicate data collected at the same site. Thin and bold lines indicate the annual minimum and maximum  $\text{pH}_{\text{in situ}}$  data, respectively, at each monitoring stations. Site locations are included to the right of each panel, with the text color corresponding to the colors in each panel.

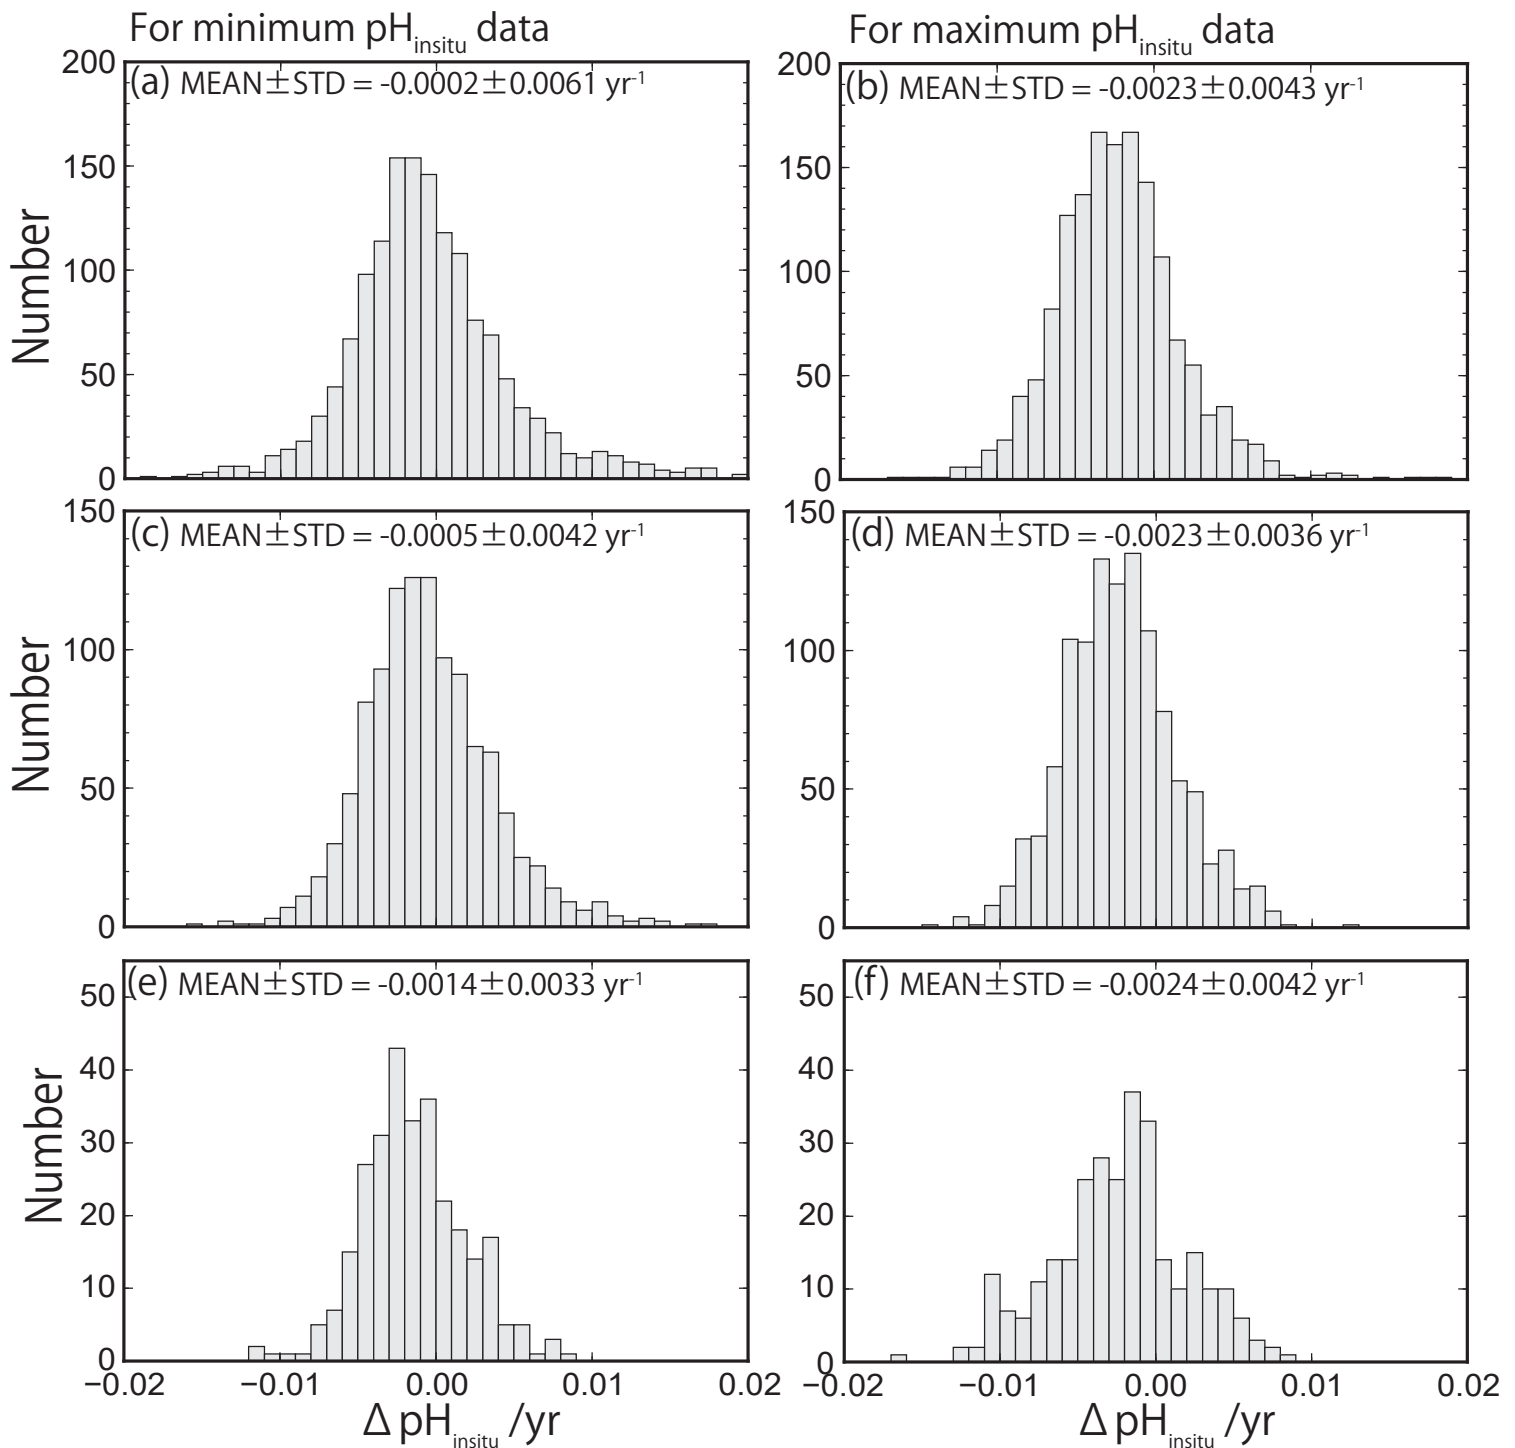

Fig. 7 Histogram of pH trends, represented by  $\Delta \text{pH}_{\text{insitu}}$ , showing the slopes of the linear regression lines for the annual minimum (left) and maximum (right)  $\text{pH}_{\text{insitu}}$  data at each monitoring site. The histograms in (a, b), (c, d), and (e, f) show three scenarios: (a, b) all 1481 available sites with continuous records before quality control, (c, d) 1127 sites without outliers, and (e, f) 289 sites that meet the strictest criterion.

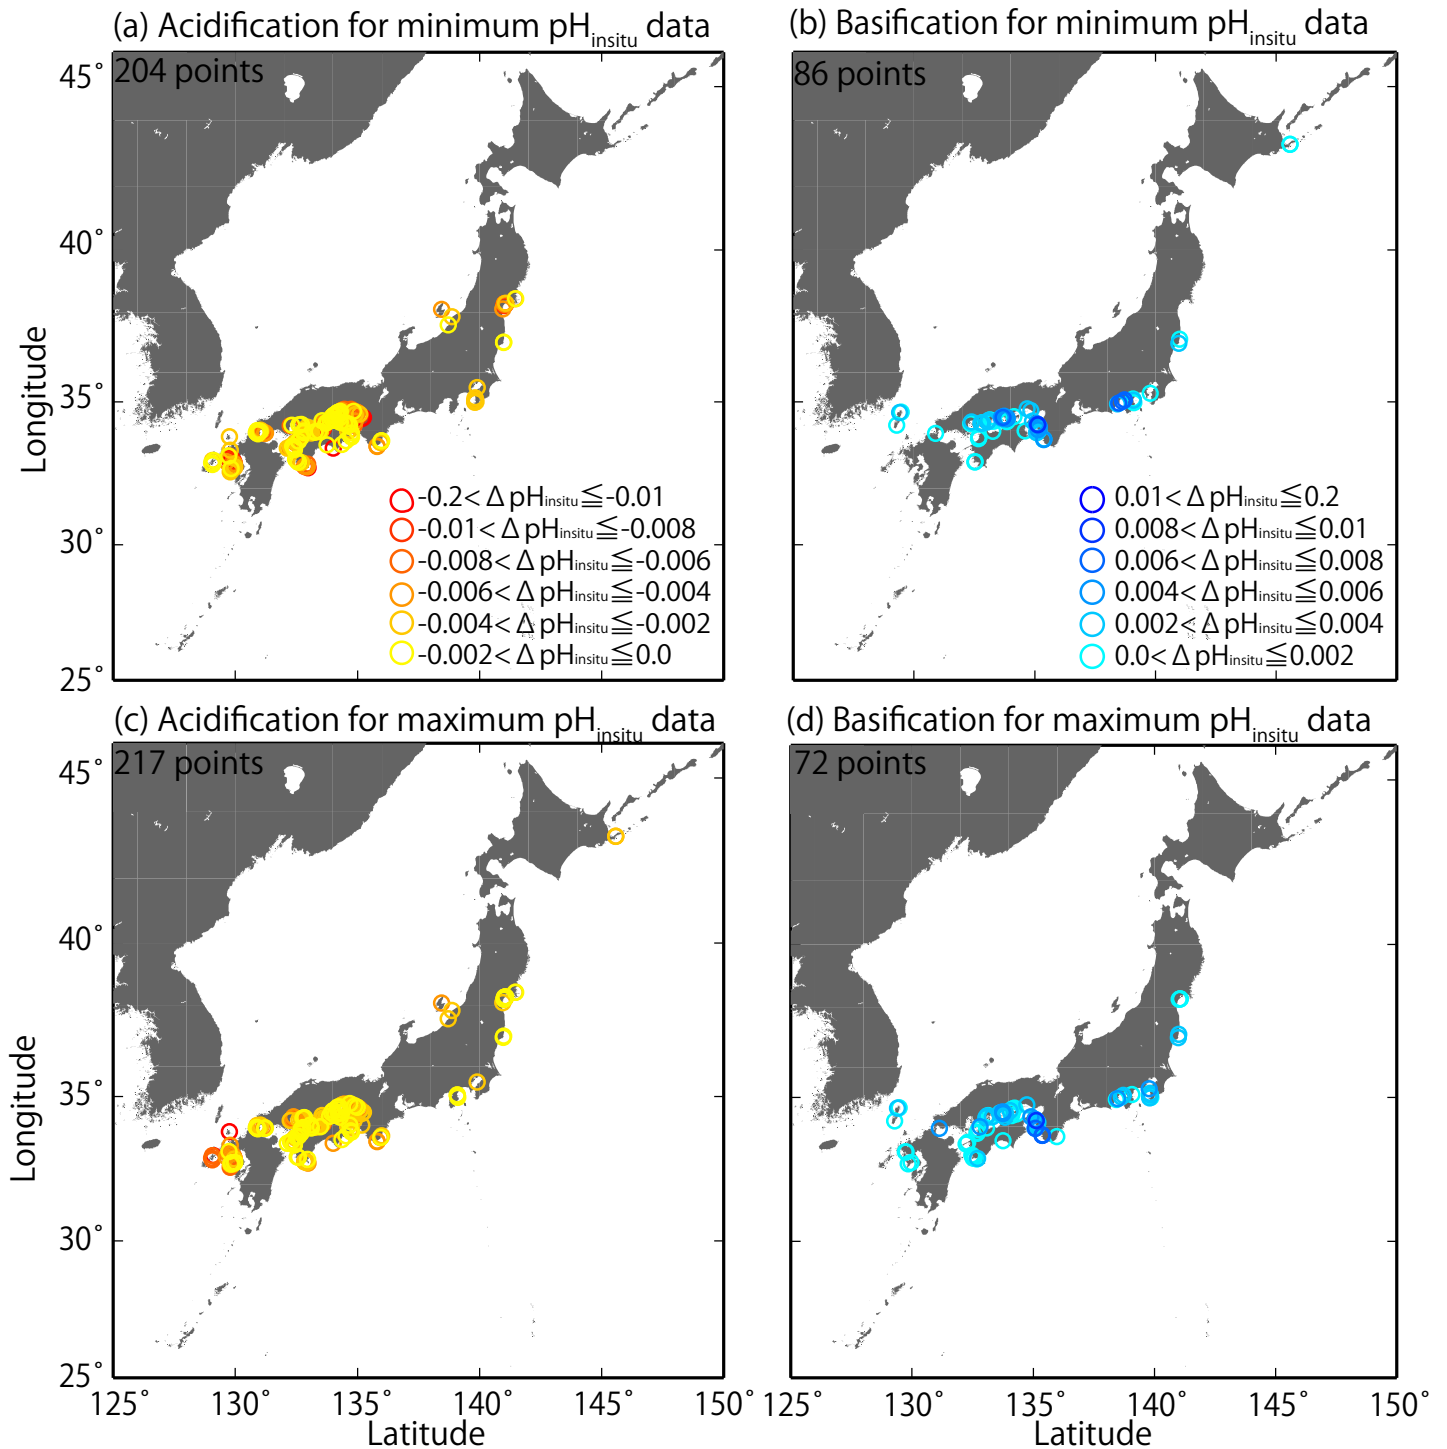

Fig. 8 Distributions of long-term trends in  $\text{pH}_{\text{insitu}}$  ( $\Delta \text{pH}_{\text{insitu}}/\text{yr}$ ) in Japanese coastal sea waters. The colors indicate the ranges of acidification (a, c) and basification (b, d). (a, b) and (c, d) are linked to the data used in Figs. 7e and 7f, respectively.

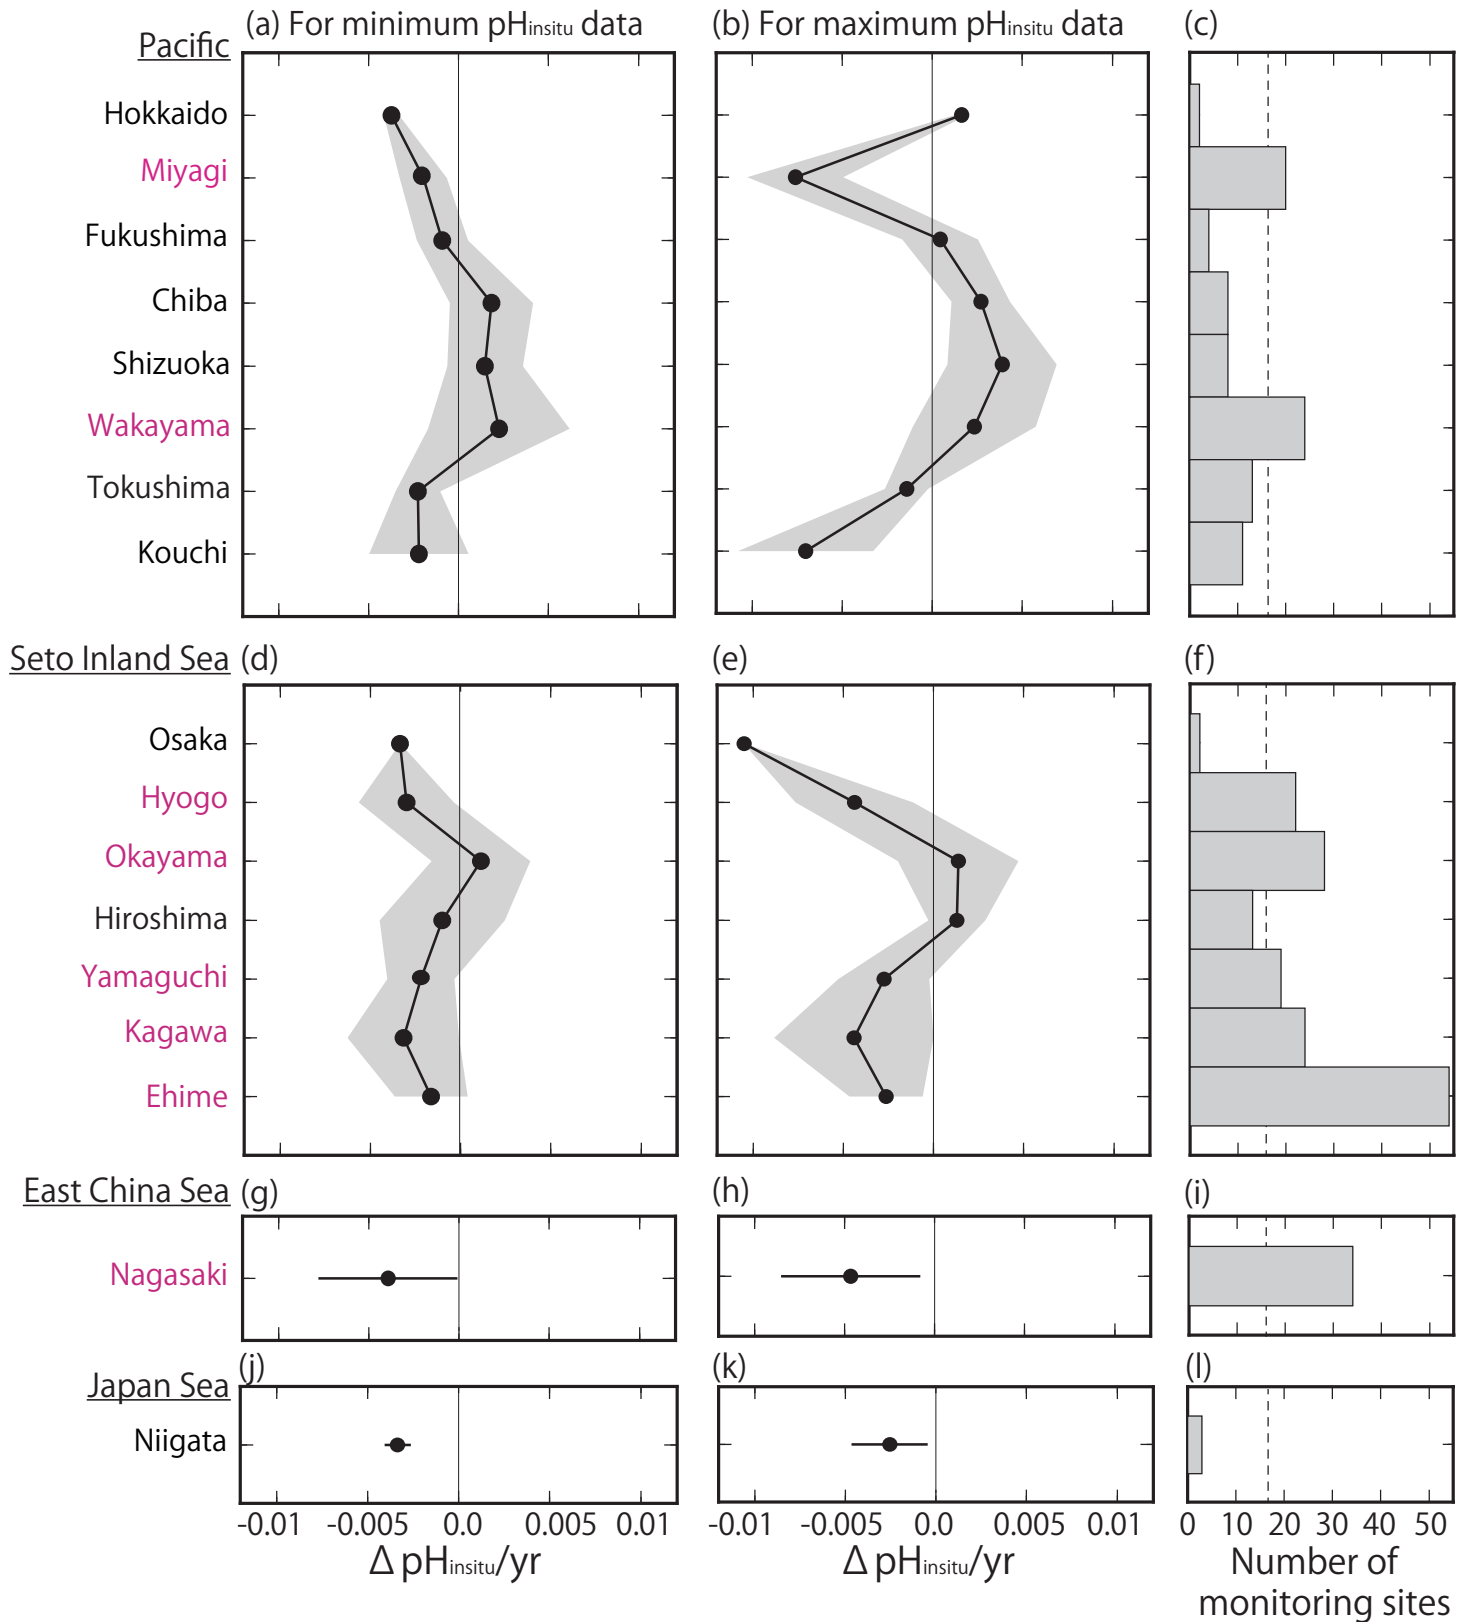

Fig. 9 (a–b, d–e, g–h, j–k) Average minimum and maximum  $\text{pH}_{\text{insitu}}$  trends ( $\Delta\text{pH}_{\text{insitu}}/\text{yr}$ ) in each prefecture. These figures show each side of the Pacific (a–b), the Seto Inland Sea (d–e), the East China Sea (g–h), and the Japan Sea (j–k). The prefecture names are arranged vertically from eastern (northern) to western (southern) areas. Black shading indicate one standard deviation from the average. (c, f, i, l) Number of monitoring sites in each prefecture and the thin dashed line is the threshold value of 17 (i.e., the average number of monitoring sites in all prefectures). The prefectures that meet the threshold are indicated in purple. The figure is based on the results shown in Figs. 7 (e, f) and 8.

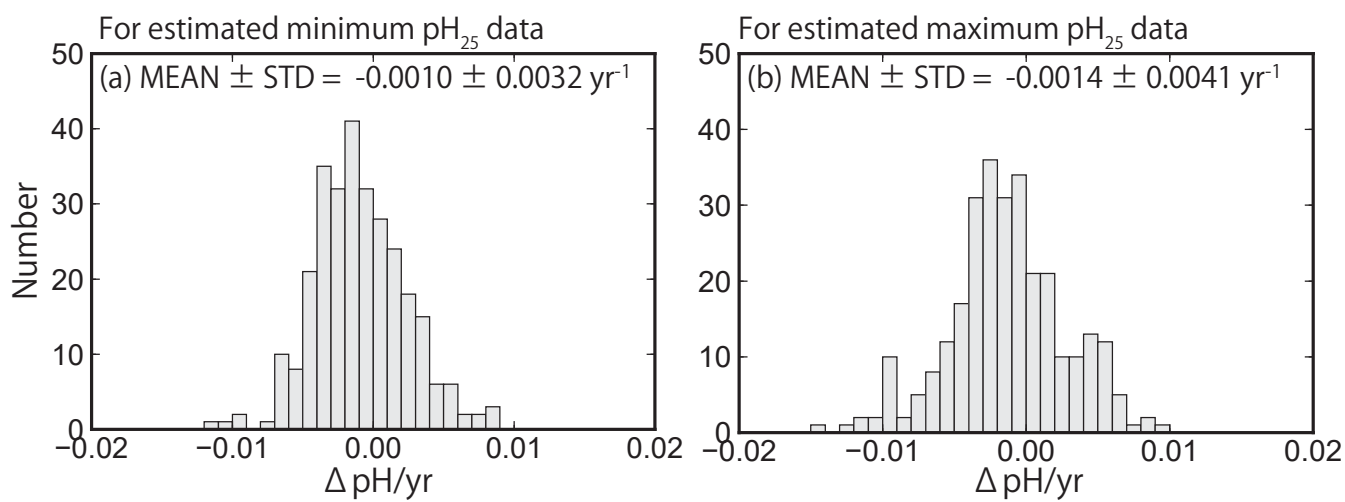

Fig. 10 Same as Fig. 7, but showing the  $\text{pH}_{25}$  trends at 289 sites (selected by quality control step 3). The value of  $\text{pH}_{25}$  was estimated using the method of Lui and Chen (2017).

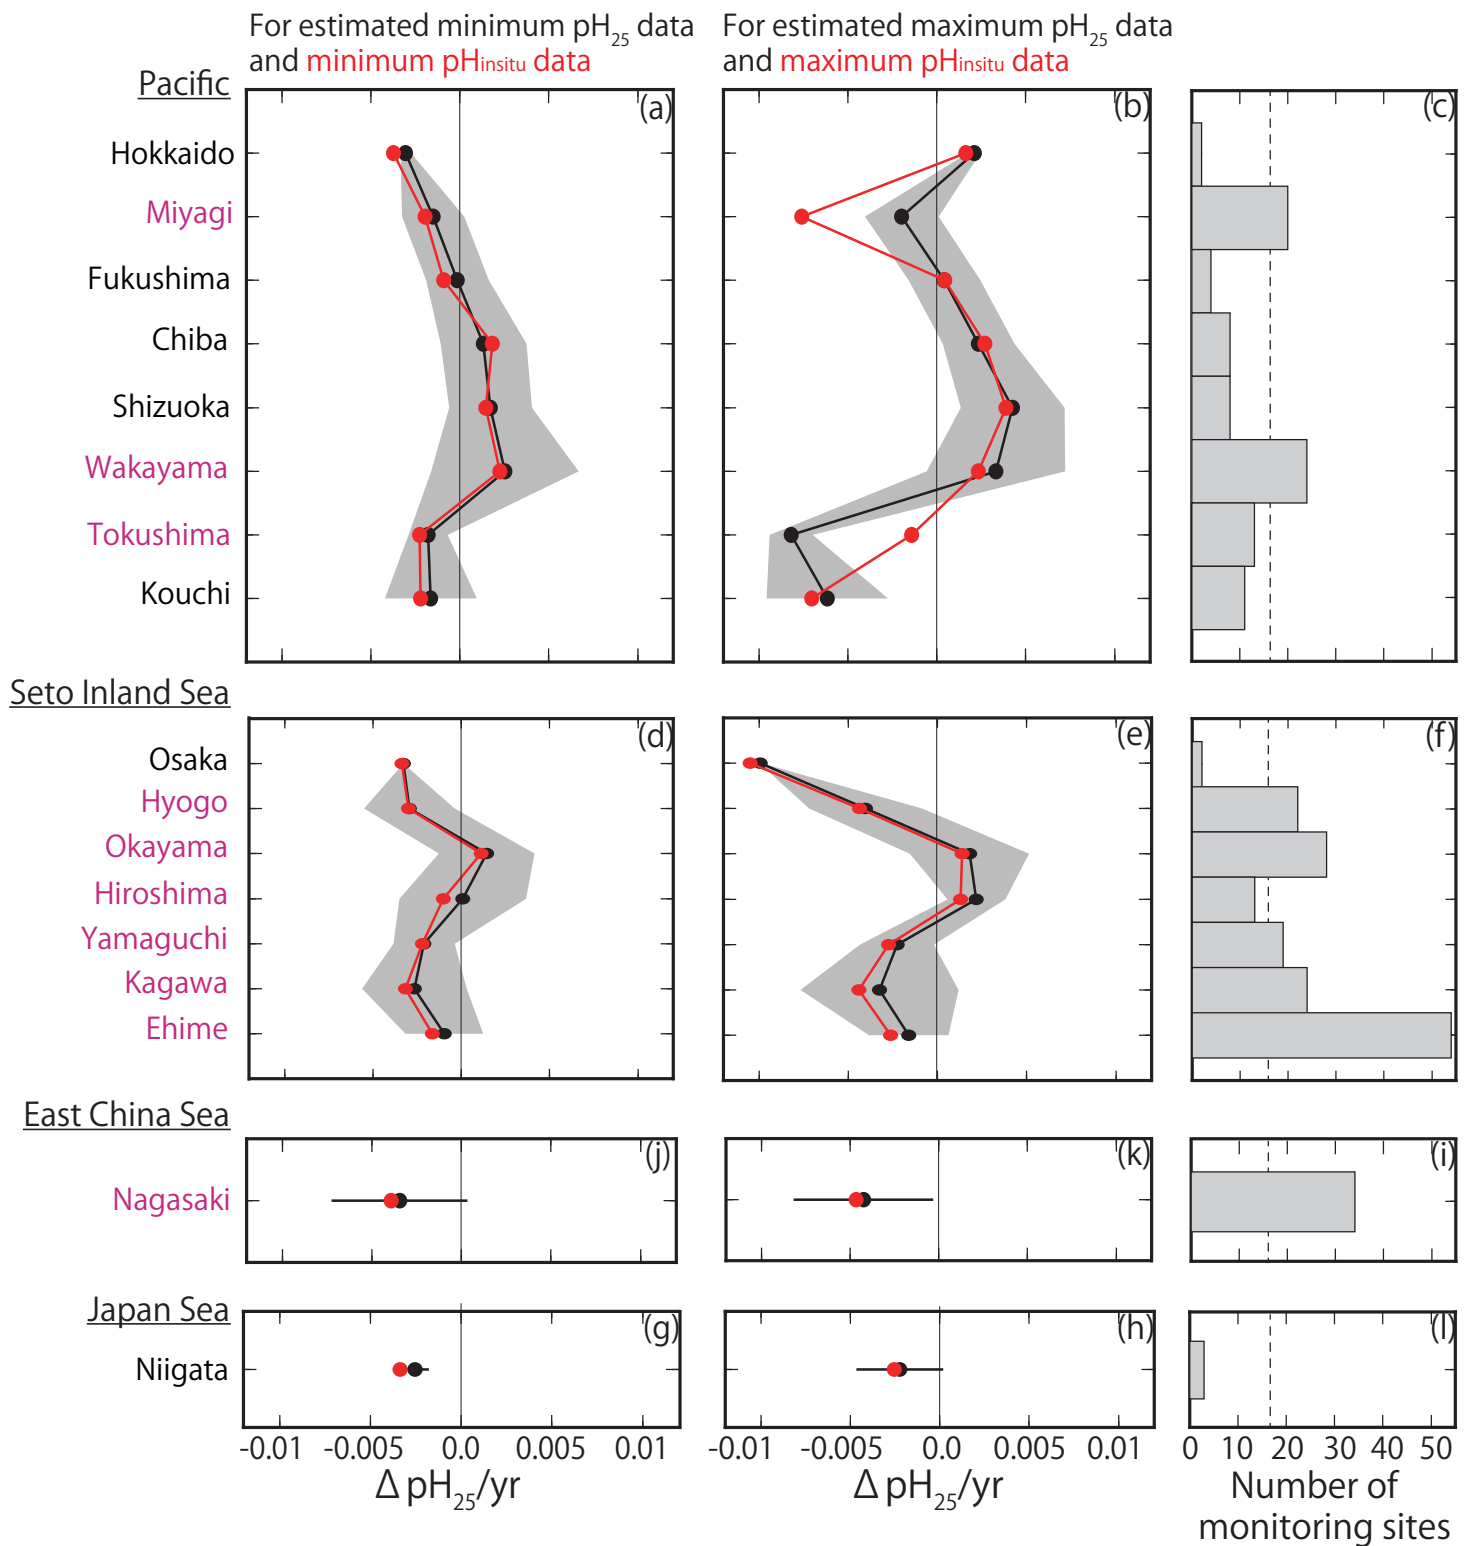

Fig. 11 (a–b, d–e, g–h, j–k) Same as Fig. 9, but showing the average estimated minimum and maximum  $pH_{25}$  trends ( $\Delta pH_{25}/yr$ ) for each prefecture. Red lines and points indicate the average minimum and maximum  $pH_{insitu}$  trends shown in Fig. 9.

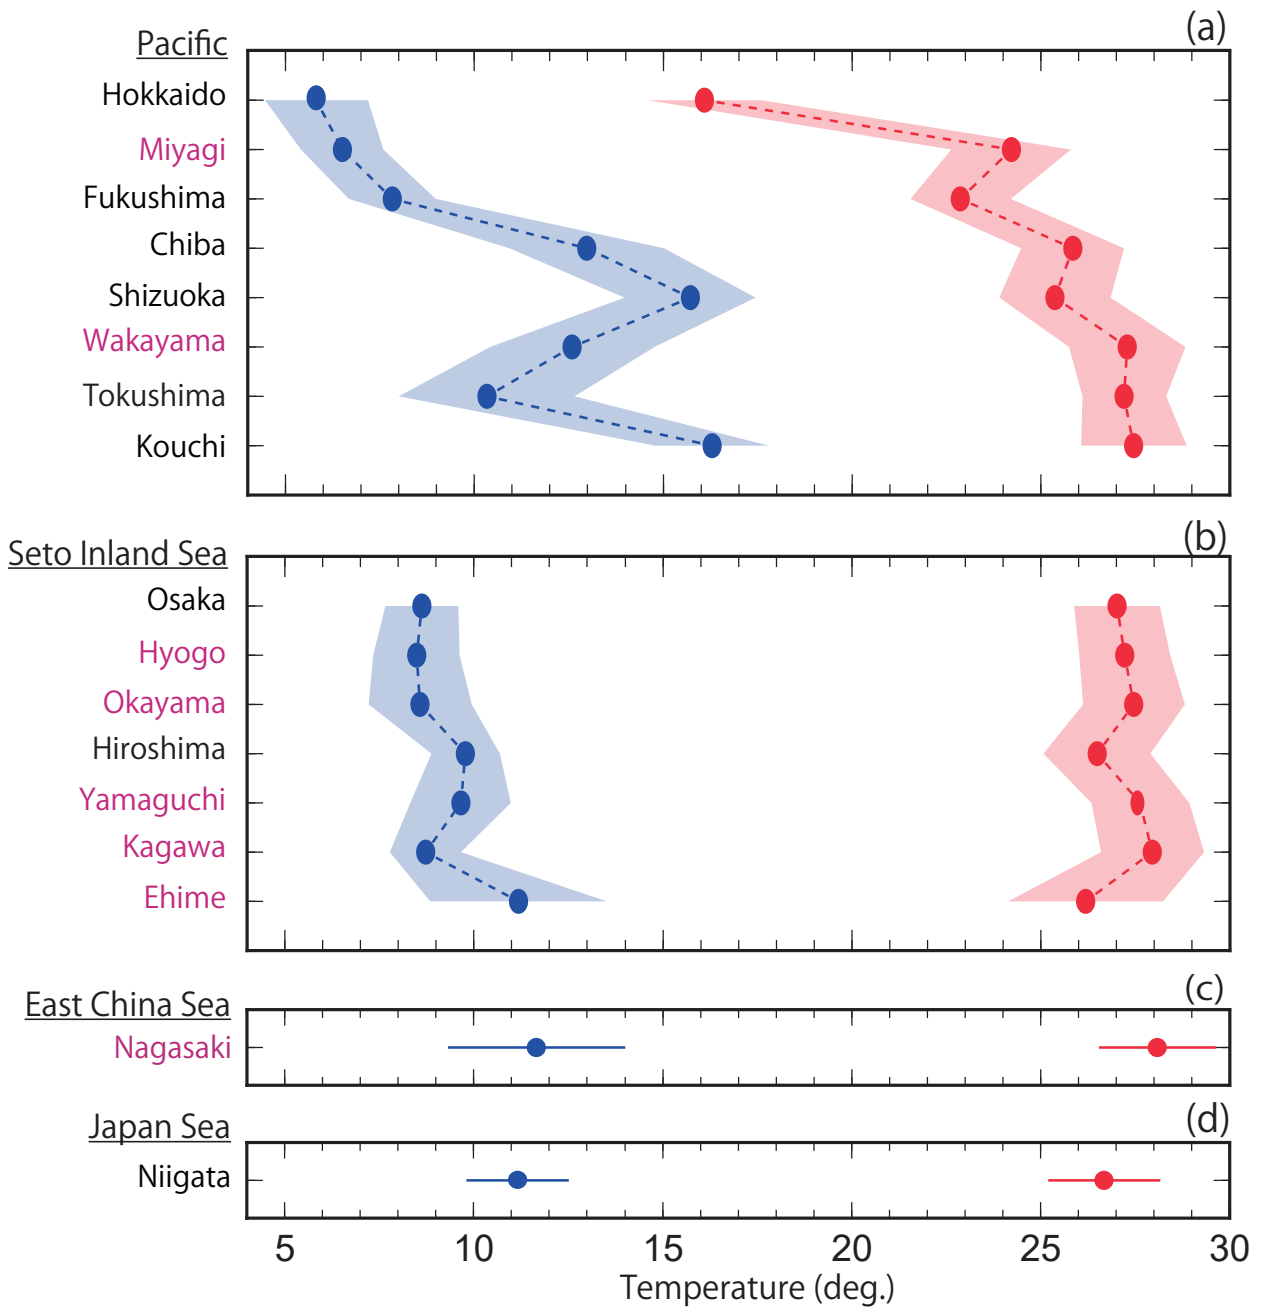

Fig. 12 Average highest and lowest temperatures observed for the minimum and maximum  $\text{pH}_{\text{insitu}}$  data for each prefecture. The blue and red lines and shading indicate the average and one standard deviation from the average, respectively. The prefectures that met the threshold of 17 are shown in purple, as in Figs. 9 (c-l) and 11 (c-l).



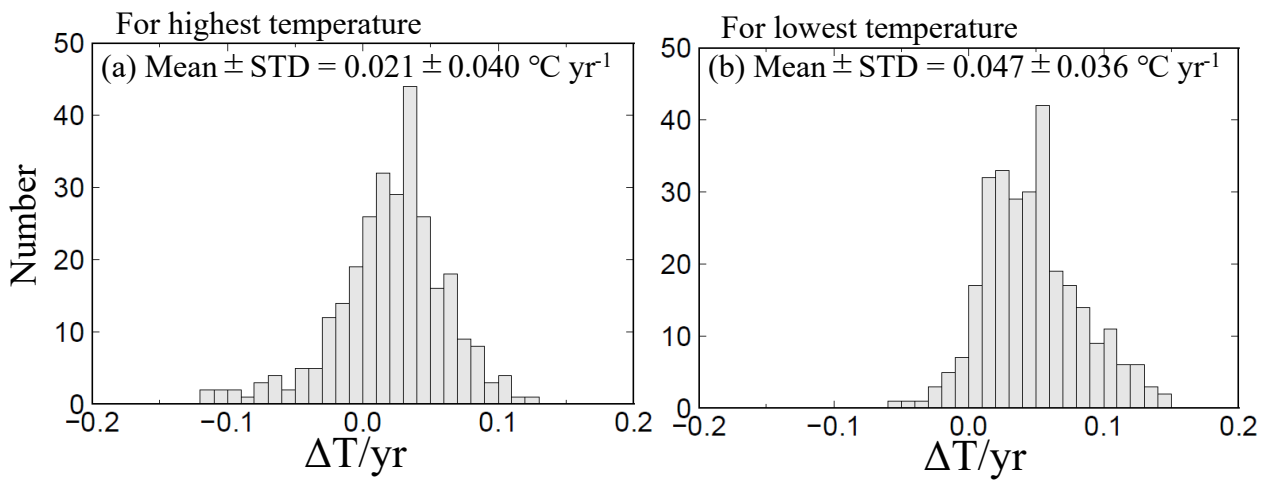

Fig. 13 Same as Fig. 7, but showing the highest and lowest temperature trends at 289 sites (selected by quality control step 3).

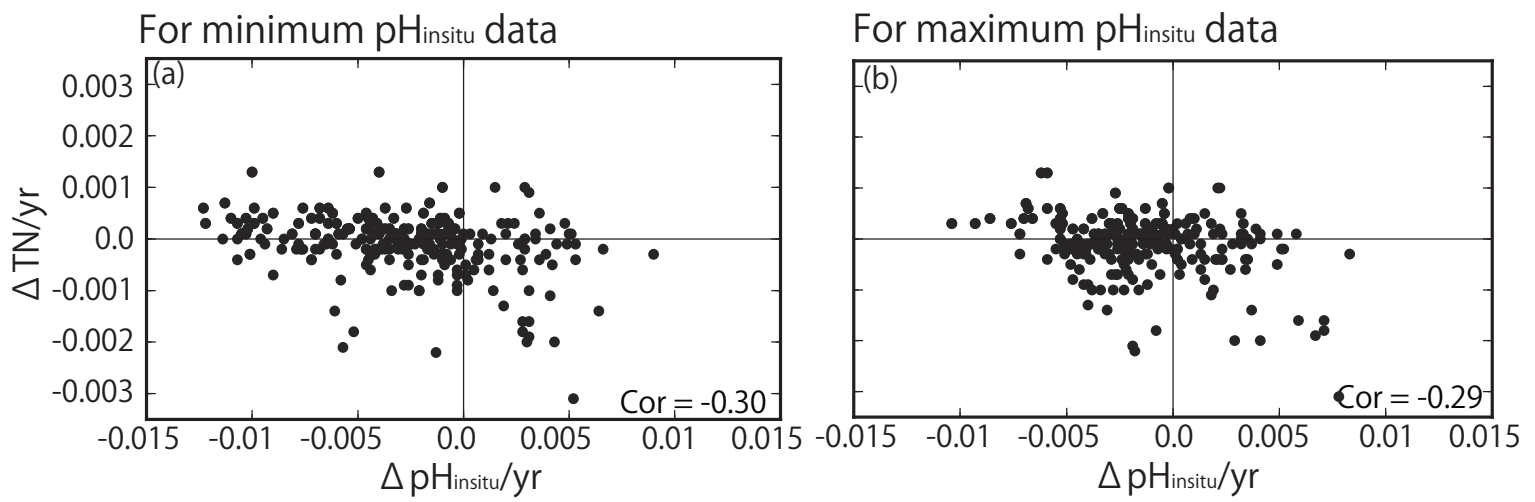

Fig. 14 Correlation between trends in total nitrogen (TN) and trends in (a) minimum and (b) maximum  $\text{pH}_{\text{insitu}}$ . The correlation coefficients are  $-0.30$  and  $-0.29$  for the minimum and maximum  $\text{pH}_{\text{insitu}}$ , respectively (significance level of 0.05,  $r = 0.128$ ; degrees of freedom = 236).

Table 1 Number of samples (N) collected at each of the 1481 monitoring sites each year.

| Year | $0 \leq N < 4$ | $4 \leq N < 8$ | $8 \leq N < 12$ | $12 \leq N < 16$ | $16 \leq N < 20$ | $20 \leq N < 24$ | $24 \leq N < 28$ | $28 \leq N < 32$ | $32 \leq N < 40$ |
|------|----------------|----------------|-----------------|------------------|------------------|------------------|------------------|------------------|------------------|
| 1978 | 43             | 391            | 83              | 303              | 87               | 15               | 176              | 9                | 4                |
| 1979 | 31             | 372            | 73              | 328              | 101              | 19               | 150              | 11               | 7                |
| 1980 | 32             | 363            | 88              | 324              | 101              | 15               | 192              | 12               | 5                |
| 1981 | 24             | 347            | 72              | 361              | 99               | 13               | 199              | 11               | 3                |
| 1982 | 25             | 350            | 74              | 364              | 93               | 9                | 206              | 11               | 4                |
| 1983 | 32             | 355            | 75              | 356              | 91               | 11               | 222              | 12               | 0                |
| 1984 | 28             | 362            | 74              | 355              | 96               | 10               | 211              | 11               | 3                |
| 1985 | 24             | 354            | 86              | 377              | 96               | 9                | 192              | 11               | 8                |
| 1986 | 25             | 361            | 81              | 334              | 98               | 8                | 235              | 11               | 9                |
| 1987 | 26             | 357            | 78              | 341              | 98               | 4                | 239              | 11               | 1                |
| 1988 | 25             | 366            | 74              | 356              | 82               | 6                | 236              | 11               | 2                |
| 1989 | 26             | 365            | 83              | 344              | 84               | 5                | 238              | 17               | 3                |
| 1990 | 24             | 377            | 76              | 347              | 83               | 1                | 238              | 14               | 5                |
| 1991 | 24             | 367            | 80              | 355              | 93               | 5                | 226              | 13               | 5                |
| 1992 | 24             | 367            | 79              | 352              | 95               | 1                | 230              | 16               | 0                |
| 1993 | 17             | 374            | 76              | 357              | 94               | 8                | 225              | 14               | 0                |
| 1994 | 17             | 376            | 85              | 347              | 102              | 24               | 208              | 14               | 3                |
| 1995 | 29             | 376            | 109             | 311              | 104              | 3                | 227              | 12               | 0                |
| 1996 | 19             | 419            | 80              | 307              | 104              | 4                | 226              | 14               | 1                |
| 1997 | 20             | 396            | 82              | 315              | 115              | 5                | 225              | 13               | 0                |
| 1998 | 16             | 389            | 103             | 325              | 99               | 0                | 225              | 12               | 0                |
| 1999 | 17             | 396            | 68              | 381              | 67               | 2                | 224              | 12               | 7                |
| 2000 | 17             | 389            | 82              | 376              | 72               | 1                | 231              | 6                | 2                |
| 2001 | 17             | 392            | 90              | 382              | 50               | 8                | 220              | 6                | 1                |
| 2002 | 17             | 368            | 102             | 392              | 49               | 1                | 229              | 7                | 0                |
| 2003 | 17             | 365            | 93              | 402              | 51               | 1                | 233              | 6                | 1                |
| 2004 | 17             | 370            | 84              | 400              | 50               | 1                | 240              | 5                | 2                |
| 2005 | 16             | 354            | 152             | 356              | 46               | 9                | 228              | 3                | 0                |
| 2006 | 16             | 370            | 134             | 345              | 50               | 0                | 244              | 5                | 3                |
| 2007 | 17             | 399            | 128             | 353              | 62               | 0                | 202              | 5                | 3                |
| 2008 | 17             | 402            | 128             | 350              | 64               | 0                | 211              | 5                | 1                |
| 2009 | 17             | 403            | 143             | 340              | 58               | 0                | 217              | 5                | 8                |

Table 2 Average mutual correlation coefficients among water temperature and  $\text{pH}_{\text{insitu}}$  measurements at adjacent monitoring sites in the same prefecture. The averages were calculated from the data for the highest and lowest temperature, and minimum and maximum  $\text{pH}_{\text{insitu}}$  within 15 km for the three criteria. We refined the sites using three quality control steps, yielding 1481 (step 1), 1127 (step 2), and 302 (step 3) sites. Two right columns represent a significant level of 5% and a degree of freedom for the correlation coefficients of each quality check procedure.

| Quality check<br>procedue | highest temperature<br>data | lowest temperature<br>data | minimum $\text{pH}_{\text{insitu}}$<br>data | maximum $\text{pH}_{\text{insitu}}$<br>data | Significance level<br>of 5% | Degree of<br>freedom |
|---------------------------|-----------------------------|----------------------------|---------------------------------------------|---------------------------------------------|-----------------------------|----------------------|
| 1                         | 0.79                        | 0.78                       | 0.51                                        | 0.64                                        | 0.10                        | 386                  |
| 2                         | 0.80                        | 0.79                       | 0.54                                        | 0.69                                        | 0.15                        | 170                  |
| 3                         | 0.85                        | 0.87                       | 0.62                                        | 0.72                                        | 0.25                        | 59                   |

Table 3 Average correlation coefficients between minimum and maximum  $\text{pH}_{\text{in situ}}$  trends and total inorganic nitrogen (TN) ones, respectively. We evaluated this for the data after each quality check procedure. Degrees of freedom in step 1 and 2 are same values, because TN data are not necessarily measured at the whole of  $\text{pH}_{\text{in situ}}$  monitoring sites. The sampling number of monitoring sites at step 1 and 2 were therefore the same number. Significant levels of 5% and degrees of freedom are also represented.

| Quality check procedue | Correlation between minimum $\Delta \text{pH}_{\text{in situ}}$ and $\Delta \text{TN}$ | Correlation between maximum $\Delta \text{pH}_{\text{in situ}}$ and $\Delta \text{TN}$ | Significant level of 5% | Degree of freedom |
|------------------------|----------------------------------------------------------------------------------------|----------------------------------------------------------------------------------------|-------------------------|-------------------|
| 1                      | -0.02                                                                                  | -0.29                                                                                  | 0.08                    | 622               |
| 2                      | -0.02                                                                                  | -0.29                                                                                  | 0.08                    | 622               |
| 3                      | -0.33                                                                                  | -0.35                                                                                  | 0.14                    | 215               |
